# Supplementary material for: A nomogram for predicting prognosis of multiple myeloma patients based on a ubiquitin-proteasome gene signature
Source: Aging (Albany NY). 2022 Dec 18;14(24):9951–68. doi: 10.18632/aging.204432 (PMC9831738; doi:10.18632/aging.204432)
Supplement: Supplementary Figures [file aging-14-204432-s001.pdf]

[www.aging-us.com](http://www.aging-us.com)

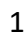

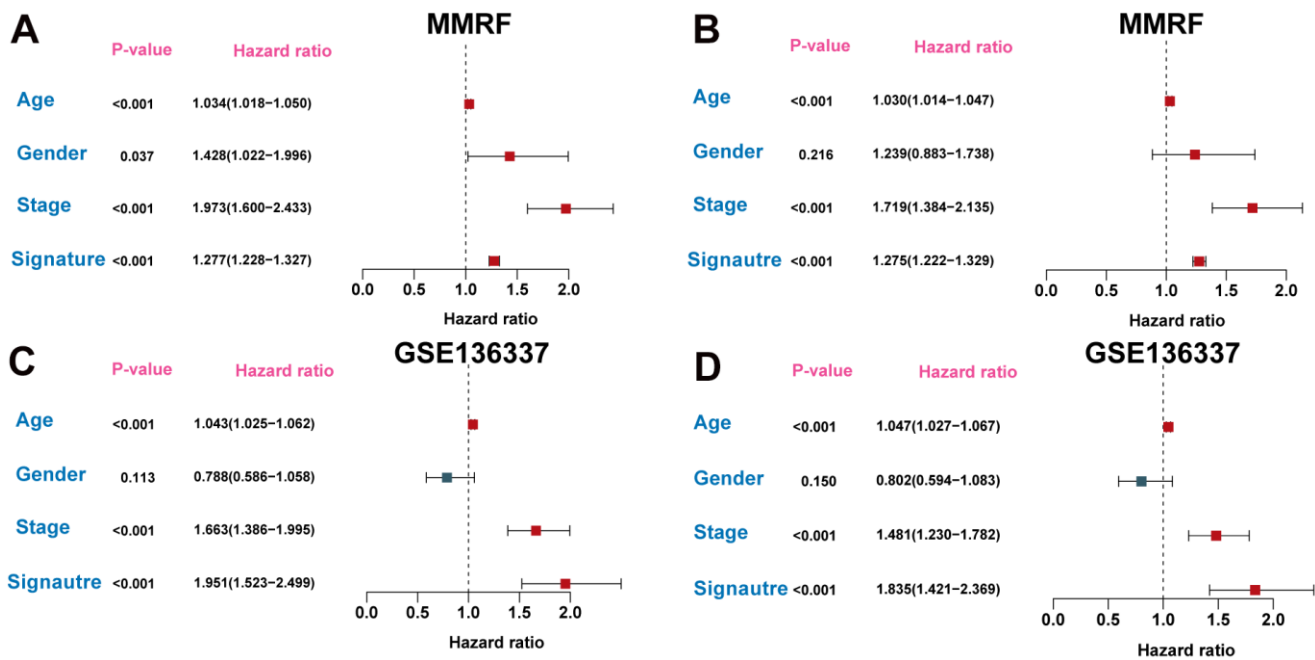

**Supplementary Figure 2. Identification of independent risk factors for MM based on univariate and multivariate analysis.** (A) Univariate analysis for MMRF. (B) Multivariate analysis for MMRF. (C) Univariate analysis for GSE136377. (D) Multivariate analysis for GSE136377.

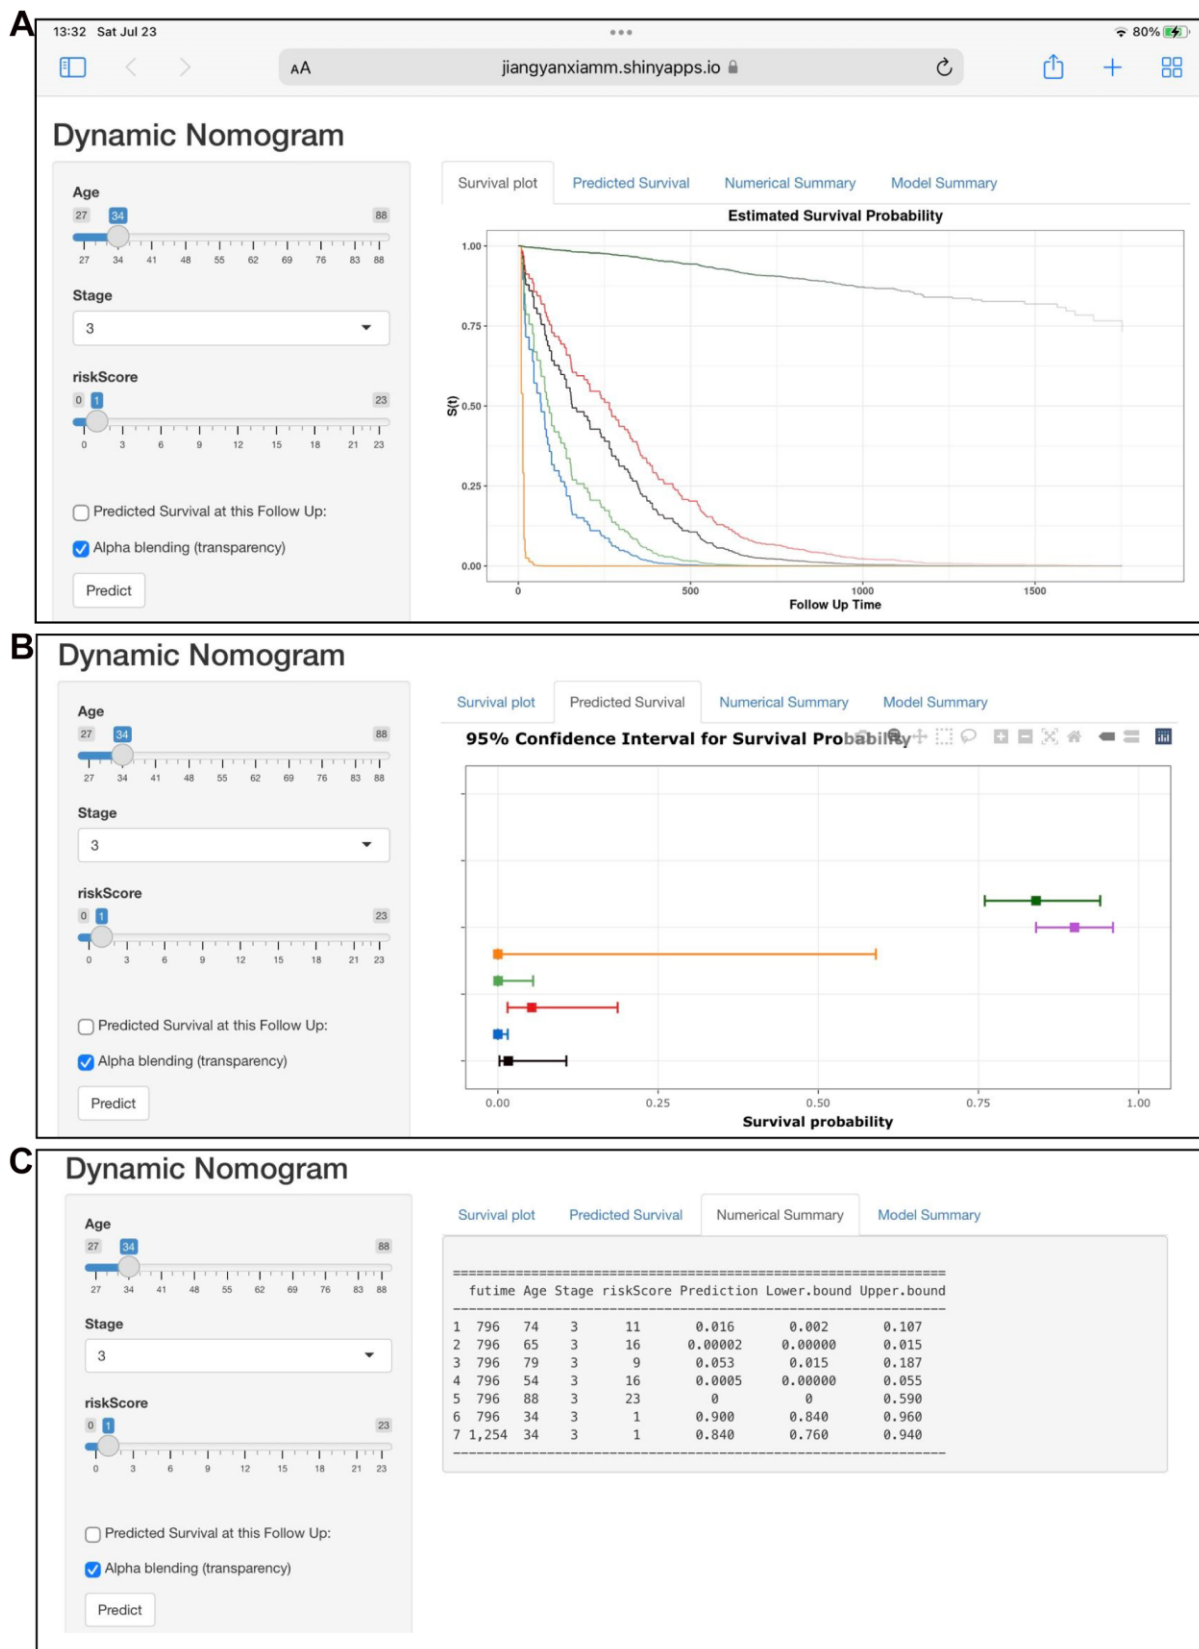

**Supplementary Figure 3. Predicting OS of MM patients via a web-based dynamic nomogram (<https://jiangyanxiamm.shinyapps.io/MMprognosis/>).** (A) Web survival rate calculator. (B) 95% confidence interval of the survival probability. (C) Numerical summary of different cases.
