# Supplementary material for: A nomogram for predicting prognosis of multiple myeloma patients based on a ubiquitin-proteasome gene signature
Source: Aging (Albany NY). 2022 Dec 18;14(24):9951–68. doi: 10.18632/aging.204432 (PMC9831738; doi:10.18632/aging.204432)
Supplement: Supplementary Table 1 [file aging-14-204432-s002.xlsx]

## Sheet: Sheet1
Supplementary Table 1. Ubiquitin proteasome system genes.
Gene ID	Gene Symbol	Name
E1s
7317	UBA1	ubiquitin like modifier activating enzyme 1(UBA1)
10054	UBA2	ubiquitin like modifier activating enzyme 2(UBA2)
9039	UBA3	ubiquitin like modifier activating enzyme 3(UBA3)
79876	UBA5	ubiquitin like modifier activating enzyme 5(UBA5)
55236	UBA6	ubiquitin like modifier activating enzyme 6(UBA6)
7318	UBA7	ubiquitin like modifier activating enzyme 7(UBA7)
10533	ATG7	autophagy related 7(ATG7)
27304	MOCS3	molybdenum cofactor synthesis 3(MOCS3)
8883	NAE1	NEDD8 activating enzyme E1 subunit 1(NAE1)
10055	SAE1	SUMO1 activating enzyme subunit 1(SAE1)
E2s
7319	UBE2A	ubiquitin conjugating enzyme E2 A(UBE2A)
7320	UBE2B	ubiquitin conjugating enzyme E2 B(UBE2B)
11065	UBE2C	ubiquitin conjugating enzyme E2 C(UBE2C)
7321	UBE2D1	ubiquitin conjugating enzyme E2 D1(UBE2D1)
7322	UBE2D2	ubiquitin conjugating enzyme E2 D2(UBE2D2)
7323	UBE2D3	ubiquitin conjugating enzyme E2 D3(UBE2D3)
51619	UBE2D4	ubiquitin conjugating enzyme E2 D4 (putative)(UBE2D4)
7324	UBE2E1	ubiquitin conjugating enzyme E2 E1(UBE2E1)
7325	UBE2E2	ubiquitin conjugating enzyme E2 E2(UBE2E2)
10477	UBE2E3	ubiquitin conjugating enzyme E2 E3(UBE2E3)
140739	UBE2F	ubiquitin conjugating enzyme E2 F (putative)(UBE2F)
7326	UBE2G1	ubiquitin conjugating enzyme E2 G1(UBE2G1)
7327	UBE2G2	ubiquitin conjugating enzyme E2 G2(UBE2G2)
7328	UBE2H	ubiquitin conjugating enzyme E2 H(UBE2H)
7329	UBE2I	ubiquitin conjugating enzyme E2 I(UBE2I)
51465	UBE2J1	ubiquitin conjugating enzyme E2 J1(UBE2J1)
118424	UBE2J2	ubiquitin conjugating enzyme E2 J2(UBE2J2)
3093	UBE2K	ubiquitin conjugating enzyme E2 K(UBE2K)
7332	UBE2L3	ubiquitin conjugating enzyme E2 L3(UBE2L3)
9246	UBE2L6	ubiquitin conjugating enzyme E2 L6(UBE2L6)
9040	UBE2M	ubiquitin conjugating enzyme E2 M(UBE2M)
7334	UBE2N	ubiquitin conjugating enzyme E2 N(UBE2N)
389898	UBE2NL	ubiquitin conjugating enzyme E2 N like (gene/pseudogene)(UBE2NL)
63893	UBE2O	ubiquitin conjugating enzyme E2 O(UBE2O)
55585	UBE2Q1	ubiquitin conjugating enzyme E2 Q1(UBE2Q1)
92912	UBE2Q2	ubiquitin conjugating enzyme E2 Q2(UBE2Q2)
134111	UBE2QL1	ubiquitin conjugating enzyme E2 Q family like 1(UBE2QL1)
54926	UBE2R2	ubiquitin conjugating enzyme E2 R2(UBE2R2)
27338	UBE2S	ubiquitin conjugating enzyme E2 S(UBE2S)
29089	UBE2T	ubiquitin conjugating enzyme E2 T(UBE2T)
148581	UBE2U	ubiquitin conjugating enzyme E2 U (putative)(UBE2U)
7335	UBE2V1	ubiquitin conjugating enzyme E2 V1(UBE2V1)
7336	UBE2V2	ubiquitin conjugating enzyme E2 V2(UBE2V2)
55284	UBE2W	ubiquitin conjugating enzyme E2 W (putative)(UBE2W)
65264	UBE2Z	ubiquitin conjugating enzyme E2 Z(UBE2Z)
83734	ATG10	autophagy related 10(ATG10)
64422	ATG3	autophagy related 3(ATG3)
57448	BIRC6	baculoviral IAP repeat containing 6(BIRC6)
997	CDC34	cell division cycle 34(CDC34)
E3s
80325	ABTB1	ankyrin repeat and BTB domain containing 1(ABTB1)
25841	ABTB2	ankyrin repeat and BTB domain containing 2(ABTB2)
267	AMFR	autocrine motility factor receptor(AMFR)
51529	ANAPC11	anaphase promoting complex subunit 11(ANAPC11)
51479	ANKFY1	ankyrin repeat and FYVE domain containing 1(ANKFY1)
54467	ANKIB1	ankyrin repeat and IBR domain containing 1(ANKIB1)
93550	ZFAND4 (ANUBL1)	zinc finger AN1-type containing 4 (ZFAND4)
25820	ARIH1	ariadne RBR E3 ubiquitin protein ligase 1(ARIH1)
10425	ARIH2	ariadne RBR E3 ubiquitin protein ligase 2(ARIH2)
79798	ARMC5	armadillo repeat containing 5(ARMC5)
136371	ASB10	ankyrin repeat and SOCS box containing 10(ASB10)
140456	ASB11	ankyrin repeat and SOCS box containing 11(ASB11)
79754	ASB13	ankyrin repeat and SOCS box containing 13(ASB13)
142686	ASB14	ankyrin repeat and SOCS box containing 14(ASB14)
142685	ASB15	ankyrin repeat and SOCS box containing 15(ASB15)
92591	ASB16	ankyrin repeat and SOCS box containing 16(ASB16)
127247	ASB17	ankyrin repeat and SOCS box containing 17(ASB17)
401036	ASB18	ankyrin repeat and SOCS box containing 18(ASB18)
51676	ASB2	ankyrin repeat and SOCS box containing 2(ASB2)
51130	ASB3	ankyrin repeat and SOCS box containing 3(ASB3)
51666	ASB4	ankyrin repeat and SOCS box containing 4(ASB4)
140458	ASB5	ankyrin repeat and SOCS box containing 5(ASB5)
140459	ASB6	ankyrin repeat and SOCS box containing 6(ASB6)
140460	ASB7	ankyrin repeat and SOCS box containing 7(ASB7)
140461	ASB8	ankyrin repeat and SOCS box containing 8(ASB8)
140462	ASB9	ankyrin repeat and SOCS box containing 9(ASB9)
546	ATRX	ATRX, chromatin remodeler(ATRX)
571	BACH1	BTB domain and CNC homolog 1(BACH1)
60468	BACH2	BTB domain and CNC homolog 2(BACH2)
580	BARD1	BRCA1 associated RING domain 1(BARD1)
604	BCL6	B-cell CLL/lymphoma 6(BCL6)
255877	BCL6B	B-cell CLL/lymphoma 6B(BCL6B)
51283	BFAR	bifunctional apoptosis regulator(BFAR)
329	BIRC2	baculoviral IAP repeat containing 2(BIRC2)
330	BIRC3	baculoviral IAP repeat containing 3(BIRC3)
79444	BIRC7	baculoviral IAP repeat containing 7(BIRC7)
112401	BIRC8	baculoviral IAP repeat containing 8(BIRC8)
648	BMI1	BMI1 proto-oncogene, polycomb ring finger(BMI1)
8315	BRAP	BRCA1 associated protein(BRAP)
672	BRCA1	BRCA1, DNA repair associated(BRCA1)
53339	BTBD1	BTB domain containing 1(BTBD1)
84280	BTBD10	BTB domain containing 10(BTBD10)
121551	BTBD11	BTB domain containing 11(BTBD11)
84464	SLX4 (BTBD12)	SLX4 structure-specific endonuclease subunit (SLX4)
388419	BTBD17	BTB domain containing 17(BTBD17)
55643	BTBD2	BTB domain containing 2(BTBD2)
22903	BTBD3	BTB domain containing 3(BTBD3)
90135	BTBD6	BTB domain containing 6(BTBD6)
55727	BTBD7	BTB domain containing 7(BTBD7)
284697	BTBD8	BTB domain containing 8(BTBD8)
114781	BTBD9	BTB domain containing 9(BTBD9)
8945	BTRC	beta-transducin repeat containing E3 ubiquitin protein ligase(BTRC)
283450	HECTD4 (C12orf51)	HECT domain E3 ubiquitin protein ligase 4(HECTD4)
64207	IRF2BPL (C14orf4)	interferon regulatory factor 2 binding protein like (IRF2BPL)
867	CBL	Cbl proto-oncogene(CBL)
868	CBLB	Cbl proto-oncogene B(CBLB)
23624	CBLC	Cbl proto-oncogene C(CBLC)
79872	CBLL1	Cbl proto-oncogene like 1(CBLL1)
881	CCIN	calicin(CCIN)
57820	CCNB1IP1	cyclin B1 interacting protein 1(CCNB1IP1)
899	CCNF	cyclin F(CCNF)
10668	CGRRF1	cell growth regulator with ring finger domain 1(CGRRF1)
55743	CHFR	checkpoint with forkhead and ring finger domains(CHFR)
1154	CISH	cytokine inducible SH2 containing protein(CISH)
4850	CNOT4	CCR4-NOT transcription complex subunit 4(CNOT4)
29894	CPSF1	cleavage and polyadenylation specific factor 1(CPSF1)
23113	CUL9	cullin 9(CUL9)
149095	DCST1	DC-STAMP domain containing 1(DCST1)
1642	DDB1	damage specific DNA binding protein 1(DDB1)
8193	DPF1	double PHD fingers 1(DPF1)
1840	DTX1	deltex E3 ubiquitin ligase 1(DTX1)
113878	DTX2	deltex E3 ubiquitin ligase 2(DTX2)
196403	DTX3	deltex E3 ubiquitin ligase 3(DTX3)
151636	DTX3L	deltex E3 ubiquitin ligase 3L(DTX3L)
23220	DTX4	deltex E3 ubiquitin ligase 4(DTX4)
9666	DZIP3	DAZ interacting zinc finger protein 3(DZIP3)
345930	ECT2L	epithelial cell transforming 2 like(ECT2L)
8507	ENC1	ectodermal-neural cortex 1(ENC1)
55120	FANCL	Fanconi anemia complementation group L(FANCL)
54850	FBXL12	F-box and leucine rich repeat protein 12(FBXL12)
222235	FBXL13	F-box and leucine rich repeat protein 13(FBXL13)
144699	FBXL14	F-box and leucine rich repeat protein 14(FBXL14)
79176	FBXL15	F-box and leucine rich repeat protein 15(FBXL15)
146330	FBXL16	F-box and leucine rich repeat protein 16(FBXL16)
80028	FBXL18	F-box and leucine rich repeat protein 18(FBXL18)
25827	FBXL2	F-box and leucine rich repeat protein 2(FBXL2)
84961	FBXL20	F-box and leucine rich repeat protein 20(FBXL20)
26224	FBXL3	F-box and leucine rich repeat protein 3(FBXL3)
26235	FBXL4	F-box and leucine rich repeat protein 4(FBXL4)
26234	FBXL5	F-box and leucine rich repeat protein 5(FBXL5)
26233	FBXL6	F-box and leucine rich repeat protein 6(FBXL6)
23194	FBXL7	F-box and leucine rich repeat protein 7(FBXL7)
55336	FBXL8	F-box and leucine rich repeat protein 8(FBXL8)
26267	FBXO10	F-box protein 10(FBXO10)
80204	FBXO11	F-box protein 11(FBXO11)
201456	FBXO15	F-box protein 15(FBXO15)
157574	FBXO16	F-box protein 16(FBXO16)
115290	FBXO17	F-box protein 17(FBXO17)
84893	FBXO18	F-box protein, helicase, 18(FBXO18)
26232	FBXO2	F-box protein 2(FBXO2)
23014	FBXO21	F-box protein 21(FBXO21)
26263	FBXO22	F-box protein 22(FBXO22)
26261	FBXO24	F-box protein 24(FBXO24)
26260	FBXO25	F-box protein 25(FBXO25)
126433	FBXO27	F-box protein 27(FBXO27)
23219	FBXO28	F-box protein 28(FBXO28)
26273	FBXO3	F-box protein 3(FBXO3)
84085	FBXO30	F-box protein 30(FBXO30)
79791	FBXO31	F-box protein 31(FBXO31)
114907	FBXO32	F-box protein 32(FBXO32)
254170	FBXO33	F-box protein 33(FBXO33)
55030	FBXO34	F-box protein 34(FBXO34)
130888	FBXO36	F-box protein 36(FBXO36)
81545	FBXO38	F-box protein 38(FBXO38)
26272	FBXO4	F-box protein 4(FBXO4)
51725	FBXO40	F-box protein 40(FBXO40)
150726	FBXO41	F-box protein 41(FBXO41)
54455	FBXO42	F-box protein 42(FBXO42)
93611	FBXO44	F-box protein 44(FBXO44)
200933	FBXO45	F-box protein 45(FBXO45)
23403	FBXO46	F-box protein 46(FBXO46)
26271	FBXO5	F-box protein 5(FBXO5)
26270	FBXO6	F-box protein 6(FBXO6)
25793	FBXO7	F-box protein 7(FBXO7)
26269	FBXO8	F-box protein 8(FBXO8)
26268	FBXO9	F-box protein 9(FBXO9)
23291	FBXW11	F-box and WD repeat domain containing 11(FBXW11)
26190	FBXW2	F-box and WD repeat domain containing 2(FBXW2)
6468	FBXW4	F-box and WD repeat domain containing 4(FBXW4)
54461	FBXW5	F-box and WD repeat domain containing 5(FBXW5)
55294	FBXW7	F-box and WD repeat domain containing 7(FBXW7)
26259	FBXW8	F-box and WD repeat domain containing 8(FBXW8)
55632	G2E3	G2/M-phase specific E3 ubiquitin protein ligase(G2E3)
8139	GAN	gigaxonin(GAN)
64395	GMCL1	germ cell-less, spermatogenesis associated 1(GMCL1)
2966	GTF2H2	general transcription factor IIH subunit 2(GTF2H2)
64412	GZF1	GDNF inducible zinc finger protein 1(GZF1)
57531	HACE1	HECT domain and ankyrin repeat containing E3 ubiquitin protein ligase 1(HACE1)
25831	HECTD1	HECT domain E3 ubiquitin protein ligase 1(HECTD1)
143279	HECTD2	HECT domain E3 ubiquitin protein ligase 2(HECTD2)
79654	HECTD3	HECT domain E3 ubiquitin protein ligase 3(HECTD3)
23072	HECW1	HECT, C2 and WW domain containing E3 ubiquitin protein ligase 1(HECW1)
57520	HECW2	HECT, C2 and WW domain containing E3 ubiquitin protein ligase 2(HECW2)
8925	HERC1	HECT and RLD domain containing E3 ubiquitin protein ligase family member 1(HERC1)
8924	HERC2	HECT and RLD domain containing E3 ubiquitin protein ligase 2(HERC2)
8916	HERC3	HECT and RLD domain containing E3 ubiquitin protein ligase 3(HERC3)
26091	HERC4	HECT and RLD domain containing E3 ubiquitin protein ligase 4(HERC4)
51191	HERC5	HECT and RLD domain containing E3 ubiquitin protein ligase 5(HERC5)
55008	HERC6	HECT and RLD domain containing E3 ubiquitin protein ligase family member 6(HERC6)
3090	HIC1	HIC ZBTB transcriptional repressor 1(HIC1)
23119	HIC2	HIC ZBTB transcriptional repressor 2(HIC2)
6596	HLTF	helicase like transcription factor(HLTF)
10075	HUWE1	HECT, UBA and WWE domain containing 1, E3 ubiquitin protein ligase(HUWE1)
25998	IBTK	inhibitor of Bruton tyrosine kinase(IBTK)
3652	IPP	intracisternal A particle-promoted polypeptide(IPP)
83737	ITCH	itchy E3 ubiquitin protein ligase(ITCH)
10625	IVNS1ABP	influenza virus NS1A binding protein(IVNS1ABP)
10324	KLHL41 (KBTBD10)	kelch like family member 41(KLHL41)
9920	KBTBD11	kelch repeat and BTB domain containing 11(KBTBD11)
166348	KBTBD12	kelch repeat and BTB domain containing 12(KBTBD12)
25948	KBTBD2	kelch repeat and BTB domain containing 2(KBTBD2)
143879	KBTBD3	kelch repeat and BTB domain containing 3(KBTBD3)
55709	KBTBD4	kelch repeat and BTB domain containing 4(KBTBD4)
131377	KLHL40 (KBTBD5)	kelch like family member 40(KLHL40)
89890	KBTBD6	kelch repeat and BTB domain containing 6(KBTBD6)
84078	KBTBD7	kelch repeat and BTB domain containing 7(KBTBD7)
84541	KBTBD8	kelch repeat and BTB domain containing 8(KBTBD8)
3736	KCNA1	potassium voltage-gated channel subfamily A member 1(KCNA1)
3744	KCNA10	potassium voltage-gated channel subfamily A member 10(KCNA10)
3737	KCNA2	potassium voltage-gated channel subfamily A member 2(KCNA2)
3738	KCNA3	potassium voltage-gated channel subfamily A member 3(KCNA3)
3739	KCNA4	potassium voltage-gated channel subfamily A member 4(KCNA4)
3741	KCNA5	potassium voltage-gated channel subfamily A member 5(KCNA5)
3742	KCNA6	potassium voltage-gated channel subfamily A member 6(KCNA6)
3743	KCNA7	potassium voltage-gated channel subfamily A member 7(KCNA7)
3745	KCNB1	potassium voltage-gated channel subfamily B member 1(KCNB1)
9312	KCNB2	potassium voltage-gated channel subfamily B member 2(KCNB2)
3746	KCNC1	potassium voltage-gated channel subfamily C member 1(KCNC1)
3747	KCNC2	potassium voltage-gated channel subfamily C member 2(KCNC2)
3748	KCNC3	potassium voltage-gated channel subfamily C member 3(KCNC3)
3749	KCNC4	potassium voltage-gated channel subfamily C member 4(KCNC4)
3750	KCND1	potassium voltage-gated channel subfamily D member 1(KCND1)
3751	KCND2	potassium voltage-gated channel subfamily D member 2(KCND2)
3752	KCND3	potassium voltage-gated channel subfamily D member 3(KCND3)
3755	KCNG1	potassium voltage-gated channel modifier subfamily G member 1(KCNG1)
170850	KCNG3	potassium voltage-gated channel modifier subfamily G member 3(KCNG3)
283518	KCNRG	potassium channel regulator(KCNRG)
3787	KCNS1	potassium voltage-gated channel modifier subfamily S member 1(KCNS1)
3788	KCNS2	potassium voltage-gated channel modifier subfamily S member 2(KCNS2)
3790	KCNS3	potassium voltage-gated channel modifier subfamily S member 3(KCNS3)
27012	KCNV1	potassium voltage-gated channel modifier subfamily V member 1(KCNV1)
284252	KCTD1	potassium channel tetramerization domain containing 1(KCTD1)
83892	KCTD10	potassium channel tetramerization domain containing 10(KCTD10)
115207	KCTD12	potassium channel tetramerization domain containing 12(KCTD12)
253980	KCTD13	potassium channel tetramerization domain containing 13(KCTD13)
65987	KCTD14	potassium channel tetramerization domain containing 14(KCTD14)
79047	KCTD15	potassium channel tetramerization domain containing 15(KCTD15)
57528	KCTD16	potassium channel tetramerization domain containing 16(KCTD16)
79734	KCTD17	potassium channel tetramerization domain containing 17(KCTD17)
23510	KCTD2	potassium channel tetramerization domain containing 2(KCTD2)
222658	KCTD20	potassium channel tetramerization domain containing 20(KCTD20)
283219	KCTD21	potassium channel tetramerization domain containing 21(KCTD21)
51133	KCTD3	potassium channel tetramerization domain containing 3(KCTD3)
386618	KCTD4	potassium channel tetramerization domain containing 4(KCTD4)
54442	KCTD5	potassium channel tetramerization domain containing 5(KCTD5)
200845	KCTD6	potassium channel tetramerization domain containing 6(KCTD6)
154881	KCTD7	potassium channel tetramerization domain containing 7(KCTD7)
154881	KCTD7	potassium channel tetramerization domain containing 7(KCTD7)
386617	KCTD8	potassium channel tetramerization domain containing 8(KCTD8)
54793	KCTD9	potassium channel tetramerization domain containing 9(KCTD9)
22992	KDM2A	lysine demethylase 2A(KDM2A)
84678	KDM2B	lysine demethylase 2B(KDM2B)
9817	KEAP1	kelch like ECH associated protein 1(KEAP1)
9870	AREL1 (KIAA0317)	apoptosis resistant E3 ubiquitin protein ligase 1(AREL1)
57542	KLHL42 (KLHDC5)	kelch like family member 42(KLHL42)
57626	KLHL1	kelch like family member 1(KLHL1)
317719	KLHL10	kelch like family member 10(KLHL10)
55175	KLHL11	kelch like family member 11(KLHL11)
59349	KLHL12	kelch like family member 12(KLHL12)
90293	KLHL13	kelch like family member 13(KLHL13)
57565	KLHL14	kelch like family member 14(KLHL14)
80311	KLHL15	kelch like family member 15(KLHL15)
339451	KLHL17	kelch like family member 17(KLHL17)
23276	KLHL18	kelch like family member 18(KLHL18)
27252	KLHL20	kelch like family member 20(KLHL20)
9903	KLHL21	kelch like family member 21(KLHL21)
84861	KLHL22	kelch like family member 22(KLHL22)
151230	KLHL23	kelch like family member 23(KLHL23)
54800	KLHL24	kelch like family member 24(KLHL24)
64410	KLHL25	kelch like family member 25(KLHL25)
55295	KLHL26	kelch like family member 26(KLHL26)
54813	KLHL28	kelch like family member 28(KLHL28)
114818	KLHL29	kelch like family member 29(KLHL29)
26249	KLHL3	kelch like family member 3(KLHL3)
377007	KLHL30	kelch like family member 30(KLHL30)
401265	KLHL31	kelch like family member 31(KLHL31)
114792	KLHL32	kelch like family member 32(KLHL32)
123103	KLHL33	kelch like family member 33(KLHL33)
257240	KLHL34	kelch like family member 34(KLHL34)
79786	KLHL36	kelch like family member 36(KLHL36)
340359	KLHL38	kelch like family member 38(KLHL38)
56062	KLHL4	kelch like family member 4(KLHL4)
51088	KLHL5	kelch like family member 5(KLHL5)
89857	KLHL6	kelch like family member 6(KLHL6)
55975	KLHL7	kelch like family member 7(KLHL7)
57563	KLHL8	kelch like family member 8(KLHL8)
55958	KLHL9	kelch like family member 9(KLHL9)
3856	KRT8	keratin 8(KRT8)
3959	LGALS3BP	galectin 3 binding protein(LGALS3BP)
84708	LNX1	ligand of numb-protein X 1(LNX1)
222484	LNX2	ligand of numb-protein X 2(LNX2)
91694	LONRF1	LON peptidase N-terminal domain and ring finger 1(LONRF1)
164832	LONRF2	LON peptidase N-terminal domain and ring finger 2(LONRF2)
79836	LONRF3	LON peptidase N-terminal domain and ring finger 3(LONRF3)
26231	LRRC29	leucine rich repeat containing 29(LRRC29)
90678	LRSAM1	leucine rich repeat and sterile alpha motif containing 1(LRSAM1)
8216	LZTR1	leucine zipper like transcription regulator 1(LZTR1)
4214	MAP3K1	mitogen-activated protein kinase kinase kinase 1(MAP3K1)
55016	2022-03-01	membrane associated ring-CH-type finger 1(MARCH1)
162333	2022-03-10	membrane associated ring-CH-type finger 10(MARCH10)
441061	2022-03-11	membrane associated ring-CH-type finger 11(MARCH11)
51257	2022-03-02	membrane associated ring-CH-type finger 2(MARCH2)
115123	2022-03-03	membrane associated ring-CH-type finger 3(MARCH3)
57574	2022-03-04	membrane associated ring-CH-type finger 4(MARCH4)
54708	2022-03-05	membrane associated ring-CH-type finger 5(MARCH5)
10299	2022-03-06	membrane associated ring-CH-type finger 6(MARCH6)
64844	2022-03-07	membrane associated ring-CH-type finger 7(MARCH7)
220972	2022-03-08	membrane associated ring-CH-type finger 8(MARCH8)
92979	2022-03-09	membrane associated ring-CH-type finger 9(MARCH9)
4193	MDM2	MDM2 proto-oncogene(MDM2)
4194	MDM4	MDM4, p53 regulator(MDM4)
92312	MEX3A	mex-3 RNA binding family member A(MEX3A)
84206	MEX3B	mex-3 RNA binding family member B(MEX3B)
51320	MEX3C	mex-3 RNA binding family member C(MEX3C)
399664	MEX3D	mex-3 RNA binding family member D(MEX3D)
196872	LINC00638 (MGC23270)	long intergenic non-protein coding RNA 638
23295	MGRN1	mahogunin ring finger 1(MGRN1)
57534	MIB1	mindbomb E3 ubiquitin protein ligase 1(MIB1)
142678	MIB2	mindbomb E3 ubiquitin protein ligase 2(MIB2)
4281	MID1	midline 1(MID1)
11043	MID2	midline 2(MID2)
23608	MKRN1	makorin ring finger protein 1(MKRN1)
23609	MKRN2	makorin ring finger protein 2(MKRN2)
7681	MKRN3	makorin ring finger protein 3(MKRN3)
4331	MNAT1	MNAT1, CDK activating kinase assembly factor(MNAT1)
55167	MSL2	male-specific lethal 2 homolog (Drosophila)(MSL2)
79594	MUL1	mitochondrial E3 ubiquitin protein ligase 1(MUL1)
23077	MYCBP2	MYC binding protein 2, E3 ubiquitin protein ligase(MYCBP2)
29116	MYLIP	myosin regulatory light chain interacting protein(MYLIP)
55892	MYNN	myoneurin(MYNN)
112939	NACC1	nucleus accumbens associated 1(NACC1)
138151	NACC2	NACC family member 2(NACC2)
4734	NEDD4	neural precursor cell expressed, developmentally down-regulated 4, E3 ubiquitin protein ligase(NEDD4)
23327	NEDD4L	neural precursor cell expressed, developmentally down-regulated 4-like, E3 ubiquitin protein ligase(NEDD4L)
9148	NEURL1(NEURL)	neuralized E3 ubiquitin protein ligase 1(NEURL1)
140825	NEURL2	neuralized E3 ubiquitin protein ligase 2(NEURL2)
93082	NEURL3	neuralized E3 ubiquitin protein ligase 3(NEURL3)
4799	NFX1	nuclear transcription factor, X-box binding 1(NFX1)
152518	NFXL1	nuclear transcription factor, X-box binding like 1(NFXL1)
378884	NHLRC1	NHL repeat containing E3 ubiquitin protein ligase 1(NHLRC1)
51070	NOSIP	nitric oxide synthase interacting protein(NOSIP)
197370	NSMCE1	NSE1 homolog, SMC5-SMC6 complex component(NSMCE1)
28962	OSTM1	osteopetrosis associated transmembrane protein 1(OSTM1)
161725	OTUD7A	OTU deubiquitinase 7A(OTUD7A)
56957	OTUD7B	OTU deubiquitinase 7B(OTUD7B)
5071	PARK2	parkin RBR E3 ubiquitin protein ligase(PARK2)
23598	PATZ1	POZ/BTB and AT hook containing zinc finger 1(PATZ1)
84759	PCGF1	polycomb group ring finger 1(PCGF1)
7703	PCGF2	polycomb group ring finger 2(PCGF2)
10336	PCGF3	polycomb group ring finger 3(PCGF3)
84333	PCGF5	polycomb group ring finger 5(PCGF5)
84108	PCGF6	polycomb group ring finger 6(PCGF6)
23024	PDZRN3	PDZ domain containing ring finger 3(PDZRN3)
29951	PDZRN4	PDZ domain containing ring finger 4(PDZRN4)
5192	PEX10	peroxisomal biogenesis factor 10(PEX10)
5193	PEX12	peroxisomal biogenesis factor 12(PEX12)
5828	PEX2	peroxisomal biogenesis factor 2(PEX2)
51533	PHF7	PHD finger protein 7(PHF7)
57661	PHRF1	PHD and ring finger domains 1(PHRF1)
64219	PJA1	praja ring finger ubiquitin ligase 1(PJA1)
9867	PJA2	praja ring finger ubiquitin ligase 2(PJA2)
5371	PML	promyelocytic leukemia(PML)
23759	PPIL2	peptidylprolyl isomerase like 2(PPIL2)
27339	PRPF19	pre-mRNA processing factor 19(PRPF19)
142684	RAB40A	RAB40A, member RAS oncogene family(RAB40A)
282808	RAB40AL	RAB40A, member RAS oncogene family-like(RAB40AL)
10966	RAB40B	RAB40B, member RAS oncogene family(RAB40B)
57799	RAB40C	RAB40C, member RAS oncogene family(RAB40C)
27342	RABGEF1	RAB guanine nucleotide exchange factor 1(RABGEF1)
56852	RAD18	RAD18, E3 ubiquitin protein ligase(RAD18)
5896	RAG1	recombination activating 1(RAG1)
5913	RAPSN	receptor associated protein of the synapse(RAPSN)
5930	RBBP6	RB binding protein 6, ubiquitin ligase(RBBP6)
10616	RBCK1	RANBP2-type and C3HC4-type zinc finger containing 1(RBCK1)
9978	RBX1	ring-box 1(RBX1)
149041	RC3H1	ring finger and CCCH-type domains 1(RC3H1)
54542	RC3H2	ring finger and CCCH-type domains 2(RC3H2)
55213	RCBTB1	RCC1 and BTB domain containing protein 1(RCBTB1)
1102	RCBTB2	RCC1 and BTB domain containing protein 2(RCBTB2)
25898	RCHY1	ring finger and CHY zinc finger domain containing 1(RCHY1)
117584	RFFL	ring finger and FYVE like domain containing E3 ubiquitin protein ligase(RFFL)
5988	RFPL1	ret finger protein like 1(RFPL1)
10738	RFPL3	ret finger protein like 3(RFPL3)
342931	RFPL4A	ret finger protein like 4A(RFPL4A)
442247	RFPL4B	ret finger protein like 4B(RFPL4B)
64326	RFWD2	ring finger and WD repeat domain 2(RFWD2)
55159	RFWD3	ring finger and WD repeat domain 3(RFWD3)
9886	RHOBTB1	Rho related BTB domain containing 1(RHOBTB1)
23221	RHOBTB2	Rho related BTB domain containing 2(RHOBTB2)
22836	RHOBTB3	Rho related BTB domain containing 3(RHOBTB3)
6015	RING1	ring finger protein 1(RING1)
51132	RLIM	ring finger protein, LIM domain interacting(RLIM)
9921	RNF10	ring finger protein 10(RNF10)
7844	RNF103	ring finger protein 103(RNF103)
26994	RNF11	ring finger protein 11(RNF11)
54778	RNF111	ring finger protein 111(RNF111)
7732	RNF112	ring finger protein 112(RNF112)
7737	RNF113A	ring finger protein 113A(RNF113A)
140432	RNF113B	ring finger protein 113B(RNF113B)
55905	RNF114	ring finger protein 114(RNF114)
27246	RNF115	ring finger protein 115(RNF115)
55298	RNF121	ring finger protein 121(RNF121)
79845	RNF122	ring finger protein 122(RNF122)
63891	RNF123	ring finger protein 123(RNF123)
54941	RNF125	ring finger protein 125(RNF125)
55658	RNF126	ring finger protein 126(RNF126)
79589	RNF128	ring finger protein 128, E3 ubiquitin protein ligase(RNF128)
11342	RNF13	ring finger protein 13(RNF13)
55819	RNF130	ring finger protein 130(RNF130)
168433	RNF133	ring finger protein 133(RNF133)
84282	RNF135	ring finger protein 135(RNF135)
51444	RNF138	ring finger protein 138(RNF138)
11236	RNF139	ring finger protein 139(RNF139)
9604	RNF14	ring finger protein 14(RNF14)
50862	RNF141	ring finger protein 141(RNF141)
9781	RNF144A	ring finger protein 144A(RNF144A)
255488	RNF144B	ring finger protein 144B(RNF144A)
153830	RNF145	ring finger protein 145(RNF145)
81847	RNF146	ring finger protein 146(RNF146)
378925	RNF148	ring finger protein 148(RNF148)
284996	RNF149	ring finger protein 149(RNF149)
57484	RNF150	ring finger protein 150(RNF150)
146310	RNF151	ring finger protein 151(RNF151)
220441	RNF152	ring finger protein 152(RNF152)
114804	RNF157	ring finger protein 157(RNF157)
26046	LTN1 (RNF160)	listerin E3 ubiquitin protein ligase 1(LTN1)
494470	RNF165	ring finger protein 165(RNF165)
115992	RNF166	ring finger protein 166(RNF166)
26001	RNF167	ring finger protein 167(RNF167)
165918	RNF168	ring finger protein 168(RNF168)
254225	RNF169	ring finger protein 169(RNF169)
56163	RNF17	ring finger protein 17(RNF17)
81790	RNF170	ring finger protein 170(RNF170)
285533	RNF175	ring finger protein 175(RNF175)
285671	RNF180	ring finger protein 180(RNF180)
51255	RNF181	ring finger protein 181(RNF181)
221687	RNF182	ring finger protein 182(RNF182)
138065	RNF183	ring finger protein 183(RNF183)
91445	RNF185	ring finger protein 185(RNF185)
54546	RNF186	ring finger protein 186(RNF186)
149603	RNF187	ring finger protein 187(RNF187)
25897	RNF19A	ring finger protein 19A, RBR E3 ubiquitin protein ligase(RNF19A)
127544	RNF19B	ring finger protein 19B(RNF19B)
6045	RNF2	ring finger protein 2(RNF2)
56254	RNF20	ring finger protein 20(RNF20)
388591	RNF207	ring finger protein 207(RNF207)
727800	RNF208	ring finger protein 208(RNF208)
285498	RNF212	ring finger protein 212(RNF212)
57674	RNF213	ring finger protein 213(RNF213)
257160	RNF214	ring finger protein 214(RNF214)
200312	RNF215	ring finger protein 215(RNF215)
54476	RNF216	ring finger protein 216(RNF216)
154214	RNF217	ring finger protein 217(RNF217)
79596	RNF219	ring finger protein 219(RNF219)
55182	RNF220	ring finger protein 220(RNF220)
11237	RNF24	ring finger protein 24(RNF24)
64320	RNF25	ring finger protein 25(RNF25)
79102	RNF26	ring finger protein 26(RNF26)
55072	RNF31	ring finger protein 31(RNF31)
140545	RNF32	ring finger protein 32(RNF32)
80196	RNF34	ring finger protein 34(RNF34)
152006	RNF38	ring finger protein 38(RNF38)
80352	RNF39	ring finger protein 39(RNF39)
6047	RNF4	ring finger protein 4(RNF4)
9810	RNF40	ring finger protein 40(RNF40)
10193	RNF41	ring finger protein 41(RNF41)
54894	RNF43	ring finger protein 43(RNF43)
22838	RNF44	ring finger protein 44(RNF44)
6048	RNF5	ring finger protein 5(RNF5)
6049	RNF6	ring finger protein 6(RNF6)
9616	RNF7	ring finger protein 7(RNF7)
9025	RNF8	ring finger protein 8(RNF8)
51136	RNFT1	ring finger protein, transmembrane 1(RNFT1)
89970	RSPRY1	ring finger and SPRY domain containing 1(RSPRY1)
23450	SF3B3	splicing factor 3b subunit 3(SF3B3)
57630	SH3RF1	SH3 domain containing ring finger 1(SH3RF1)
153769	SH3RF2	SH3 domain containing ring finger 2(SH3RF2)
92799	SHKBP1	SH3KBP1 binding protein 1(SHKBP1)
257218	SHPRH	SNF2 histone linker PHD RING helicase(SHPRH)
6477	SIAH1	siah E3 ubiquitin protein ligase 1(SIAH1)
6478	SIAH2	siah E3 ubiquitin protein ligase 2(SIAH2)
6502	SKP2	S-phase kinase associated protein 2(SKP2)
57154	SMURF1	SMAD specific E3 ubiquitin protein ligase 1(SMURF1)
64750	SMURF2	SMAD specific E3 ubiquitin protein ligase 2(SMURF2)
8651	SOCS1	suppressor of cytokine signaling 1(SOCS1)
8835	SOCS2	suppressor of cytokine signaling 2(SOCS2)
9021	SOCS3	suppressor of cytokine signaling 3(SOCS3)
122809	SOCS4	suppressor of cytokine signaling 4(SOCS4)
9655	SOCS5	suppressor of cytokine signaling 5(SOCS5)
9306	SOCS6	suppressor of cytokine signaling 6(SOCS6)
30837	SOCS7	suppressor of cytokine signaling 7(SOCS7)
8405	SPOP	speckle type BTB/POZ protein(SPOP)
339745	SPOPL	speckle type BTB/POZ protein like(SPOPL)
84767	TRIM51 (SPRYD5)	tripartite motif-containing 51(TRIM51)
80176	SPSB1	splA/ryanodine receptor domain and SOCS box containing 1(SPSB1)
84727	SPSB2	splA/ryanodine receptor domain and SOCS box containing 2(SPSB2)
90864	SPSB3	splA/ryanodine receptor domain and SOCS box containing 3(SPSB3)
92369	SPSB4	splA/ryanodine receptor domain and SOCS box containing 4(SPSB4)
10273	STUB1	STIP1 homology and U-box containing protein 1(STUB1)
84447	SYVN1	synoviolin 1(SYVN1)
6924	TCEB3	transcription elongation factor B subunit 3(TCEB3)
7126	TNFAIP1	TNF alpha induced protein 1(TNFAIP1)
7128	TNFAIP3	TNF alpha induced protein 3(TNFAIP3)
10210	TOPORS	TOP1 binding arginine/serine rich protein(TOPORS)
7186	TRAF2	TNF receptor associated factor 2(TRAF2)
7187	TRAF3	TNF receptor associated factor 3(TRAF3)
9618	TRAF4	TNF receptor associated factor 4(TRAF4)
7188	TRAF5	TNF receptor associated factor 5(TRAF5)
7189	TRAF6	TNF receptor associated factor 6(TRAF6)
84231	TRAF7	TNF receptor associated factor 7(TRAF7)
10293	TRAIP	TRAF interacting protein(TRAIP)
10107	TRIM10	tripartite motif containing 10(TRIM10)
81559	TRIM11	tripartite motif containing 11(TRIM11)
10206	TRIM13	tripartite motif containing 13(TRIM13)
89870	TRIM15	tripartite motif containing 15(TRIM15)
51127	TRIM17	tripartite motif containing 17(TRIM17)
23321	TRIM2	tripartite motif containing 2(TRIM2)
6737	TRIM21	tripartite motif containing 21(TRIM21)
10346	TRIM22	tripartite motif containing 22(TRIM22)
373	TRIM23	tripartite motif containing 23(TRIM23)
8805	TRIM24	tripartite motif containing 24(TRIM24)
7706	TRIM25	tripartite motif containing 25(TRIM25)
7726	TRIM26	tripartite motif containing 26(TRIM26)
5987	TRIM27	tripartite motif containing 27(TRIM27)
10155	TRIM28	tripartite motif containing 28(TRIM28)
10612	TRIM3	tripartite motif containing 3(TRIM3)
11074	TRIM31	tripartite motif containing 31(TRIM31)
22954	TRIM32	tripartite motif containing 32(TRIM32)
51592	TRIM33	tripartite motif containing 33(TRIM33)
53840	TRIM34	tripartite motif containing 34(TRIM34)
23087	TRIM35	tripartite motif containing 35(TRIM35)
55521	TRIM36	tripartite motif containing 36(TRIM36)
4591	TRIM37	tripartite motif containing 37(TRIM37)
10475	TRIM38	tripartite motif containing 38(TRIM38)
56658	TRIM39	tripartite motif containing 39(TRIM39)
89122	TRIM4	tripartite motif containing 4(TRIM4)
135644	TRIM40	tripartite motif containing 40(TRIM40)
90933	TRIM41	tripartite motif containing 41(TRIM41)
287015	TRIM42	tripartite motif containing 42(TRIM42)
129868	TRIM43	tripartite motif containing 43(TRIM43)
80263	TRIM45	tripartite motif containing 45(TRIM45)
80128	TRIM46	tripartite motif containing 46(TRIM46)
91107	TRIM47	tripartite motif containing 47(TRIM47)
79097	TRIM48	tripartite motif containing 48(TRIM48)
57093	TRIM49	tripartite motif containing 49(TRIM49)
85363	TRIM5	tripartite motif containing 5(TRIM5)
135892	TRIM50	tripartite motif containing 50(TRIM50)
84851	TRIM52	tripartite motif containing 52(TRIM52)
57159	TRIM54	tripartite motif containing 54(TRIM54)
84675	TRIM55	tripartite motif containing 55(TRIM55)
81844	TRIM56	tripartite motif containing 56(TRIM56)
25893	TRIM58	tripartite motif containing 58(TRIM58)
286827	TRIM59	tripartite motif containing 59(TRIM59)
117854	TRIM6	tripartite motif containing 6(TRIM6)
166655	TRIM60	tripartite motif containing 60(TRIM60)
391712	TRIM61	tripartite motif containing 61(TRIM61)
55223	TRIM62	tripartite motif containing 62(TRIM62)
84676	TRIM63	tripartite motif containing 63(TRIM63)
120146	TRIM64	tripartite motif containing 64(TRIM64)
201292	TRIM65	tripartite motif containing 65(TRIM65)
440730	TRIM67	tripartite motif containing 67(TRIM67)
55128	TRIM68	tripartite motif containing 68(TRIM68)
140691	TRIM69	tripartite motif containing 69(TRIM69)
81786	TRIM7	tripartite motif containing 7(TRIM7)
493829	TRIM72	tripartite motif containing 72(TRIM72)
378108	TRIM74	tripartite motif containing 74(TRIM74)
390231	TRIM77	tripartite motif containing 77(TRIM77)
81603	TRIM8	tripartite motif containing 8(TRIM8)
114088	TRIM9	tripartite motif containing 9(TRIM9)
339976	TRIML1	tripartite motif family like 1(TRIML1)
9320	TRIP12	thyroid hormone receptor interactor 12(TRIP12)
7267	TTC3	tetratricopeptide repeat domain 3(TTC3)
56995	TULP4	tubby like protein 4(TULP4)
7337	UBE3A	ubiquitin protein ligase E3A(UBE3A)
89910	UBE3B	ubiquitin protein ligase E3B(UBE3B)
9690	UBE3C	ubiquitin protein ligase E3C(UBE3C)
9354	UBE4A	ubiquitination factor E4A(UBE4A)
10277	UBE4B	ubiquitination factor E4B(UBE4B)
22888	UBOX5	U-box domain containing 5(UBOX5)
22888	UBOX5	U-box domain containing 5(UBOX5)
197131	UBR1	ubiquitin protein ligase E3 component n-recognin 1(UBR1)
23304	UBR2	ubiquitin protein ligase E3 component n-recognin 2(UBR2)
130507	UBR3	ubiquitin protein ligase E3 component n-recognin 3 (putative)(UBR3)
23352	UBR4	ubiquitin protein ligase E3 component n-recognin 4(UBR4)
51366	UBR5	ubiquitin protein ligase E3 component n-recognin 5(UBR5)
29128	UHRF1	ubiquitin like with PHD and ring finger domains 1(UHRF1)
115426	UHRF2	ubiquitin like with PHD and ring finger domains 2(UHRF2)
85451	UNK	unkempt family zinc finger(UNK)
64718	UNKL	unkempt family like zinc finger(UNKL)
7428	VHL	von Hippel-Lindau tumor suppressor(VHL)
55823	VPS11	VPS11, CORVET/HOPS core subunit(VPS11)
57617	VPS18	VPS18, CORVET/HOPS core subunit(VPS18)
27072	VPS41	VPS41, HOPS complex subunit(VPS41)
23355	VPS8	VPS8, CORVET complex subunit(VPS8)
151525	WDSUB1	WD repeat, sterile alpha motif and U-box domain containing 1(WDSUB1)
7468	WHSC1	Wolf-Hirschhorn syndrome candidate 1(WHSC1)
26118	WSB1	WD repeat and SOCS box containing 1(WSB1)
55884	WSB2	WD repeat and SOCS box containing 2(WSB2)
11059	WWP1	WW domain containing E3 ubiquitin protein ligase 1(WWP1)
11060	WWP2	WW domain containing E3 ubiquitin protein ligase 2(WWP2)
331	XIAP	X-linked inhibitor of apoptosis(XIAP)
22890	ZBTB1	zinc finger and BTB domain containing 1(ZBTB1)
65986	ZBTB10	zinc finger and BTB domain containing 10(ZBTB10)
27107	ZBTB11	zinc finger and BTB domain containing 11(ZBTB11)
221527	ZBTB12	zinc finger and BTB domain containing 12(ZBTB12)
7704	ZBTB16	zinc finger and BTB domain containing 16(ZBTB16)
7709	ZBTB17	zinc finger and BTB domain containing 17(ZBTB17)
57621	ZBTB2	zinc finger and BTB domain containing 2(ZBTB2)
26137	ZBTB20	zinc finger and BTB domain containing 20(ZBTB20)
9278	ZBTB22	zinc finger and BTB domain containing 22(ZBTB22)
9841	ZBTB24	zinc finger and BTB domain containing 24(ZBTB24)
7597	ZBTB25	zinc finger and BTB domain containing 25(ZBTB25)
57684	ZBTB26	zinc finger and BTB domain containing 26(ZBTB26)
79842	ZBTB3	zinc finger and BTB domain containing 3(ZBTB3)
27033	ZBTB32	zinc finger and BTB domain containing 32(ZBTB32)
10009	ZBTB33	zinc finger and BTB domain containing 33(ZBTB33)
84614	ZBTB37	zinc finger and BTB domain containing 37(ZBTB37)
253461	ZBTB38	zinc finger and BTB domain containing 38(ZBTB38)
9880	ZBTB39	zinc finger and BTB domain containing 39(ZBTB39)
57659	ZBTB4	zinc finger and BTB domain containing 4(ZBTB4)
9923	ZBTB40	zinc finger and BTB domain containing 40(ZBTB40)
360023	ZBTB41	zinc finger and BTB domain containing 41(ZBTB41)
23099	ZBTB43	zinc finger and BTB domain containing 43(ZBTB43)
29068	ZBTB44	zinc finger and BTB domain containing 44(ZBTB44)
84878	ZBTB45	zinc finger and BTB domain containing 45(ZBTB45)
140685	ZBTB46	zinc finger and BTB domain containing 46(ZBTB46)
3104	ZBTB48	zinc finger and BTB domain containing 48(ZBTB48)
166793	ZBTB49	zinc finger and BTB domain containing 49(ZBTB49)
9925	ZBTB5	zinc finger and BTB domain containing 5(ZBTB5)
10773	ZBTB6	zinc finger and BTB domain containing 6(ZBTB6)
51341	ZBTB7A	zinc finger and BTB domain containing 7A(ZBTB7A)
51043	ZBTB7B	zinc finger and BTB domain containing 7B(ZBTB7B)
201501	ZBTB7C	zinc finger and BTB domain containing 7C(ZBTB7C)
653121	ZBTB8A	zinc finger and BTB domain containing 8A(ZBTB8A)
221504	ZBTB9	zinc finger and BTB domain containing 9(ZBTB9)
60685	ZFAND3	zinc finger AN1-type containing 3(ZFAND3)
7763	ZFAND5	zinc finger AN1-type containing 5(ZFAND5)
54469	ZFAND6	zinc finger AN1-type containing 6(ZFAND6)
7541	ZBTB14 (ZFP161)	zinc finger and BTB domain containing 14(ZBTB14)
7542	ZFPL1	zinc finger protein like 1(ZFPL1)
7690	ZNF131	zinc finger protein 131(ZNF131)
10472	ZBTB18 (ZNF238)	zinc finger and BTB domain containing 18(ZBTB18)
49854	ZBTB21 (ZNF295)	zinc finger and BTB domain containing 21(ZBTB21)
90850	ZNF598	zinc finger protein 598(ZNF598)
158506	ZNF645	zinc finger protein 645(ZNF645)
84937	ZNRF1	zinc and ring finger 1(ZNRF1)
223082	ZNRF2	zinc and ring finger 2(ZNRF2)
84133	ZNRF3	zinc and ring finger 3(ZNRF3)
148066	ZNRF4	zinc and ring finger 4(ZNRF4)
151112	ZSWIM2	zinc finger SWIM-type containing 2(ZSWIM2)
PCs
5682	PSMA1	proteasome subunit alpha 1(PSMA1)
5683	PSMA2	proteasome subunit alpha 2(PSMA2)
5684	PSMA3	proteasome subunit alpha 3(PSMA3)
5685	PSMA4	proteasome subunit alpha 4(PSMA4)
5686	PSMA5	proteasome subunit alpha 5(PSMA5)
5687	PSMA6	proteasome subunit alpha 6(PSMA6)
5688	PSMA7	proteasome subunit alpha 7(PSMA7)
143471	PSMA8	proteasome subunit alpha 8(PSMA8)
5689	PSMB1	proteasome subunit beta 1(PSMB1)
5699	PSMB10	proteasome subunit beta 10(PSMB10)
122706	PSMB11	proteasome subunit beta 11(PSMB11)
5690	PSMB2	proteasome subunit beta 2(PSMB2)
5691	PSMB3	proteasome subunit beta 3(PSMB3)
5692	PSMB4	proteasome subunit beta 4(PSMB4)
5693	PSMB5	proteasome subunit beta 5(PSMB5)
5694	PSMB6	proteasome subunit beta 6(PSMB6)
5695	PSMB7	proteasome subunit beta 7(PSMB7)
5696	PSMB8	proteasome subunit beta 8(PSMB8)
5698	PSMB9	proteasome subunit beta 9(PSMB9)
5700	PSMC1	proteasome 26S subunit, ATPase 1(PSMC1)
5701	PSMC2	proteasome 26S subunit, ATPase 2(PSMC2)
5702	PSMC3	proteasome 26S subunit, ATPase 3(PSMC3)
29893	PSMC3IP	PSMC3 interacting protein(PSMC3IP)
5704	PSMC4	proteasome 26S subunit, ATPase 4(PSMC4)
5705	PSMC5	proteasome 26S subunit, ATPase 5(PSMC5)
5706	PSMC6	proteasome 26S subunit, ATPase 6(PSMC6)
5707	PSMD1	proteasome 26S subunit, non-ATPase 1(PSMD1)
5716	PSMD10	proteasome 26S subunit, non-ATPase 10(PSMD10)
5717	PSMD11	proteasome 26S subunit, non-ATPase 11(PSMD11)
5718	PSMD12	proteasome 26S subunit, non-ATPase 12(PSMD12)
5719	PSMD13	proteasome 26S subunit, non-ATPase 13(PSMD13)
10213	PSMD14	proteasome 26S subunit, non-ATPase 14(PSMD14)
5708	PSMD2	proteasome 26S subunit, non-ATPase 2(PSMD2)
5709	PSMD3	proteasome 26S subunit, non-ATPase 3(PSMD3)
5710	PSMD4	proteasome 26S subunit, non-ATPase 4(PSMD4)
5711	PSMD5	proteasome 26S subunit, non-ATPase 5(PSMD5)
9861	PSMD6	proteasome 26S subunit, non-ATPase 6(PSMD6)
5713	PSMD7	proteasome 26S subunit, non-ATPase 7(PSMD7)
5714	PSMD8	proteasome 26S subunit, non-ATPase 8(PSMD8)
5715	PSMD9	proteasome 26S subunit, non-ATPase 9(PSMD9)
5720	PSME1	proteasome activator subunit 1(PSME1)
5721	PSME2	proteasome activator subunit 2(PSME2)
10197	PSME3	proteasome activator subunit 3(PSME3)
23198	PSME4	proteasome activator subunit 4(PSME4)
9491	PSMF1	proteasome inhibitor subunit 1(PSMF1)
8624	PSMG1	proteasome assembly chaperone 1(PSMG1)
56984	PSMG2	proteasome assembly chaperone 2(PSMG2)
84262	PSMG3	proteasome assembly chaperone 3(PSMG3)
389362	PSMG4	proteasome assembly chaperone 4(PSMG4)
51371	POMP	proteasome maturation protein(POMP)
23392	KIAA0368	KIAA0368(KIAA0368)
11047	ADRM1	adhesion regulating molecule 1(ADRM1)
80227	PAAF1	proteasomal ATPase associated factor 1（PAAF1）
DUBs
4287	ATXN3	ataxin 3(ATXN3)
92552	ATXN3L	ataxin 3 like(ATXN3L)
8314	BAP1	BRCA1 associated protein 1(BAP1)
79184	BRCC3	BRCA1/BRCA2-containing complex subunit 3(BRCC3)
10987	COPS5	COP9 signalosome subunit 5(COPS5)
10980	COPS6	COP9 signalosome subunit 6(COPS6)
1540	CYLD	CYLD lysine 63 deubiquitinase(CYLD)
8665	EIF3F	eukaryotic translation initiation factor 3 subunit F(EIF3F)
8667	EIF3H	eukaryotic translation initiation factor 3 subunit H(EIF3H)
9929	JOSD1	Josephin domain containing 1(JOSD1)
126119	JOSD2	Josephin domain containing 2(JOSD2)
84954	MPND	MPN domain containing(MPND)
114803	MYSM1	Myb like, SWIRM and MPN domains 1(MYSM1)
55611	OTUB1	OTU deubiquitinase, ubiquitin aldehyde binding 1(OTUB1)
78990	OTUB2	OTU deubiquitinase, ubiquitin aldehyde binding 2(OTUB2)
220213	OTUD1	OTU deubiquitinase 1(OTUD1)
23252	OTUD3	OTU deubiquitinase 3(OTUD3)
54726	OTUD4	OTU deubiquitinase 4(OTUD4)
55593	OTUD5	OTU deubiquitinase 5(OTUD5)
139562	OTUD6A	OTU deubiquitinase 6A(OTUD6A)
51633	OTUD6B	OTU domain containing 6B(OTUD6B)
161725	OTUD7A	OTU deubiquitinase 7A(OTUD7A)
56957	OTUD7B	OTU deubiquitinase 7B(OTUD7B)
9924	PAN2	PAN2 poly(A) specific ribonuclease subunit
10594	PRPF8	pre-mRNA processing factor 8(PRPF8)
10213	PSMD14	proteasome 26S subunit, non-ATPase 14(PSMD14)
5713	PSMD7	proteasome 26S subunit, non-ATPase 7(PSMD7)
10617	STAMBP	STAM binding protein(STAMBP)
57559	STAMBPL1	STAM binding protein like 1(STAMBPL1)
7128	TNFAIP3	TNF alpha induced protein 3(TNFAIP3)
7345	UCHL1	ubiquitin C-terminal hydrolase L1(UCHL1)
7347	UCHL3	ubiquitin C-terminal hydrolase L3(UCHL3)
51377	UCHL5	ubiquitin C-terminal hydrolase L5(UCHL5)
7398	USP1	ubiquitin specific peptidase 1(USP1)
9100	USP10	ubiquitin specific peptidase 10(USP10)
8237	USP11	ubiquitin specific peptidase 11(USP11)
219333	USP12	ubiquitin specific peptidase 12(USP12)
8975	USP13	ubiquitin specific peptidase 13 (isopeptidase T-3)(USP13)
9097	USP14	ubiquitin specific peptidase 14(USP14)
9958	USP15	ubiquitin specific peptidase 15(USP15)
10600	USP16	ubiquitin specific peptidase 16(USP16)
391627	USP17	ubiquitin specific peptidase 17-like family member 9, pseudogene (USP17L9P)
377630	USP17L2	ubiquitin specific peptidase 17-like family member 2(USP17L2)
391622	USP17L6P	ubiquitin specific peptidase 17-like family member 6, pseudogene(USP17L6P)
11274	USP18	ubiquitin specific peptidase 18(USP18)
10869	USP19	ubiquitin specific peptidase 19(USP19)
9099	USP2	ubiquitin specific peptidase 2(USP2)
10868	USP20	ubiquitin specific peptidase 20(USP20)
27005	USP21	ubiquitin specific peptidase 21(USP21)
23326	USP22	ubiquitin specific peptidase 22(USP22)
23358	USP24	ubiquitin specific peptidase 24(USP24)
29761	USP25	ubiquitin specific peptidase 25(USP25)
83844	USP26	ubiquitin specific peptidase 26(USP26)
389856	USP27X	ubiquitin specific peptidase 27, X-linked(USP27X)
57646	USP28	ubiquitin specific peptidase 28(USP28)
57663	USP29	ubiquitin specific peptidase 29(USP29)
9960	USP3	ubiquitin specific peptidase 3(USP3)
84749	USP30	ubiquitin specific peptidase 30(USP30)
57478	USP31	ubiquitin specific peptidase 31(USP31)
84669	USP32	ubiquitin specific peptidase 32(USP32)
23032	USP33	ubiquitin specific peptidase 33(USP33)
9736	USP34	ubiquitin specific peptidase 34(USP34)
57558	USP35	ubiquitin specific peptidase 35(USP35)
57602	USP36	ubiquitin specific peptidase 36(USP36)
57695	USP37	ubiquitin specific peptidase 37(USP37)
84640	USP38	ubiquitin specific peptidase 38(USP38)
10713	USP39	ubiquitin specific peptidase 39(USP39)
7375	USP4	ubiquitin specific peptidase 4(USP4)
55230	USP40	ubiquitin specific peptidase 40(USP40)
84132	USP42	ubiquitin specific peptidase 42(USP42)
124739	USP43	ubiquitin specific peptidase 43(USP43)
84101	USP44	ubiquitin specific peptidase 44(USP44)
85015	USP45	ubiquitin specific peptidase 45(USP45)
64854	USP46	ubiquitin specific peptidase 46(USP46)
55031	USP47	ubiquitin specific peptidase 47(USP47)
84196	USP48	ubiquitin specific peptidase 48(USP48)
25862	USP49	ubiquitin specific peptidase 49(USP49)
8078	USP5	ubiquitin specific peptidase 5(USP5)
373509	USP50	ubiquitin specific peptidase 50(USP50)
158880	USP51	ubiquitin specific peptidase 51(USP51)
54532	USP53	ubiquitin specific peptidase 53(USP53)
159195	USP54	ubiquitin specific peptidase 54(USP54)
9098	USP6	ubiquitin specific peptidase 6(USP6)
9712	USP6NL	USP6 N-terminal like(USP6NL)
7874	USP7	ubiquitin specific peptidase 7(USP7)
9101	USP8	ubiquitin specific peptidase 8(USP8)
8239	USP9X	ubiquitin specific peptidase 9, X-linked(USP9X)
8287	USP9Y	ubiquitin specific peptidase 9, Y-linked(USP9Y)
10208	USPL1	ubiquitin specific peptidase like 1(USPL1)
80124	VCPIP1	valosin containing protein interacting protein 1(VCPIP1)
55432	YOD1	YOD1 deubiquitinase(YOD1)
54764	ZRANB1	zinc finger RANBP2-type containing 1 (ZRANB1)
