# Supplementary material for: A nomogram for predicting prognosis of multiple myeloma patients based on a ubiquitin-proteasome gene signature
Source: Aging (Albany NY). 2022 Dec 18;14(24):9951–68. doi: 10.18632/aging.204432 (PMC9831738; doi:10.18632/aging.204432)
Supplement: Supplementary Table 2 [file aging-14-204432-s003.xlsx]

## Sheet: Sheet1
Supplementary Table 2. Survival related ubiquitin-proteasome genes in MMRF-COMPASS.
Symbol	Hazard Ratio	HR.95L	HR.95H	p-value
ABTB2	1.49987	1.22138	1.84185	0.000109594
ADRM1	2.12327	1.68998	2.66765	1.01e-10
ANAPC11	2.56744	1.99666	3.3014	1.98e-13
ANKFY1	1.42843	1.1199	1.82196	0.00407771
ANKIB1	1.45077	1.1734	1.79372	0.000588252
ARIH1	1.48423	1.12635	1.95584	0.00502986
ARIH2	1.44142	1.13116	1.83677	0.00311088
ARMC5	2.01448	1.57382	2.57852	2.69e-08
ASB11	2.28776	1.02201	5.12114	0.0441229
ASB13	1.35012	1.19034	1.53134	2.99e-06
ASB14	1.45378	1.05768	1.99822	0.0211401
ASB16	1.70093	1.36786	2.11509	1.78e-06
ASB18	142772	10.5171	1938168015	0.0145013
ASB2	1.48982	1.31404	1.68912	4.87e-10
ASB3	1.67698	1.29853	2.16572	7.44e-05
ASB6	1.76462	1.37532	2.26411	7.97e-06
ASB7	1.5365	1.23946	1.90473	8.91e-05
ASB8	1.89266	1.46092	2.45199	1.37e-06
ASB9	2.36843	1.61056	3.48292	1.18e-05
ATG10	1.66586	1.24813	2.22339	0.000530719
ATG3	1.74929	1.35169	2.26384	2.13e-05
ATG7	2.23973	1.60378	3.12784	2.22e-06
ATRX	1.58274	1.22807	2.03983	0.000389574
ATXN3	1.89772	1.42515	2.52698	1.16e-05
ATXN3L	2.38235	1.2442	4.56165	0.00881388
BACH1	1.23164	1.05031	1.44428	0.0103448
BACH2	1.30811	1.11267	1.53787	0.0011414
BAP1	1.87943	1.46332	2.41387	7.75e-07
BARD1	1.89837	1.5253	2.36269	9.37e-09
BCL6	1.27757	1.12896	1.44575	0.000103438
BCL6B	1.35415	1.02945	1.78127	0.0302015
BFAR	1.54302	1.21459	1.96026	0.000382307
BIRC2	1.42271	1.15761	1.74852	0.000804854
BIRC6	1.48619	1.18498	1.86396	0.000606445
BMI1	1.21875	1.03279	1.43819	0.0191829
BRAP	1.96798	1.52927	2.53257	1.43e-07
BRCA1	2.12363	1.79332	2.51477	2.51e-18
BRCC3	1.76683	1.47068	2.12261	1.2e-09
BTBD1	1.74093	1.38574	2.18716	1.92e-06
BTBD10	1.80347	1.44727	2.24733	1.5e-07
BTBD17	1.6352	1.01433	2.63611	0.0435549
BTBD2	1.49354	1.20448	1.85196	0.00025692
BTBD6	1.27368	1.0487	1.54693	0.0147078
BTBD7	1.72598	1.32584	2.24688	4.99e-05
BTBD8	2.06299	1.37488	3.09549	0.000469357
BTRC	1.43372	1.09081	1.88441	0.00978869
CBL	1.53012	1.27521	1.83598	4.77e-06
CBLC	2.99713	1.49241	6.01901	0.00203258
CBLL1	1.59563	1.29133	1.97165	1.5e-05
CCIN	5.17486	1.07367	24.9419	0.0405068
CCNB1IP1	1.49034	1.273	1.74479	7e-07
CCNF	2.71855	2.23593	3.30535	1.13e-23
CDC34	1.71665	1.34921	2.18416	1.1e-05
CGRRF1	1.65201	1.28079	2.13081	0.000110728
CHFR	1.38064	1.10021	1.73254	0.00536252
CNOT4	1.51713	1.16619	1.97368	0.0019004
COPS5	2.22449	1.74818	2.83056	7.84e-11
COPS6	2.08132	1.62196	2.67076	8.35e-09
CPSF1	1.75601	1.42781	2.15966	9.63e-08
CUL9	1.74892	1.38332	2.21113	2.98e-06
DCST1	2.50009	1.62553	3.84516	3.02e-05
DDB1	2.05767	1.61286	2.62514	6.38e-09
DPF1	2.72461	2.10141	3.53263	3.9e-14
DTX2	1.87001	1.40063	2.4967	2.19e-05
DTX3	1.20301	1.00957	1.43351	0.0387887
DTX3L	1.22461	1.04326	1.43748	0.0132165
DZIP3	1.37484	1.10886	1.70461	0.00370871
EIF3F	1.27226	1.02478	1.57951	0.0291313
EIF3H	1.54574	1.24433	1.92015	8.31e-05
ENC1	1.30143	1.15524	1.46612	1.47e-05
FANCL	1.70765	1.38053	2.11229	8.14e-07
FBXL12	1.6039	1.31412	1.95758	3.37e-06
FBXL13	1.65193	1.35557	2.01307	6.5e-07
FBXL14	1.44904	1.17711	1.78378	0.0004693
FBXL15	1.61004	1.22493	2.11623	0.000638951
FBXL18	2.12304	1.479	3.04751	4.47e-05
FBXL20	1.68286	1.31223	2.15817	4.12e-05
FBXL3	1.39741	1.11256	1.7552	0.00401465
FBXL4	1.36348	1.1062	1.68059	0.00366085
FBXL5	1.46152	1.12432	1.89985	0.00457439
FBXL6	1.99811	1.60214	2.49195	8.11e-10
FBXL7	1.39428	1.21487	1.60019	2.25e-06
FBXL8	1.51364	1.21824	1.88066	0.000182529
FBXO11	1.65395	1.3078	2.09172	2.67e-05
FBXO15	3.35063	1.14093	9.83998	0.0278191
FBXO21	1.76185	1.36373	2.27619	1.47e-05
FBXO22	1.35935	1.10067	1.67883	0.00436444
FBXO24	33.4273	7.01175	159.359	1.06e-05
FBXO25	1.58112	1.21471	2.05806	0.000659105
FBXO27	1.33772	1.02348	1.74844	0.033182
FBXO28	1.88381	1.54232	2.3009	5.44e-10
FBXO3	1.2819	1.01737	1.61522	0.0352029
FBXO30	1.26612	1.01715	1.57603	0.0346695
FBXO31	1.65826	1.31865	2.08533	1.52e-05
FBXO33	1.29056	1.08614	1.53346	0.00374279
FBXO34	1.63246	1.31252	2.03039	1.07e-05
FBXO36	1.76709	1.22578	2.54745	0.0022819
FBXO38	1.68826	1.31054	2.17486	5.06e-05
FBXO4	1.54361	1.21909	1.95453	0.000312145
FBXO40	2.15746	1.7268	2.69553	1.3e-11
FBXO41	1.313	1.14448	1.50633	0.0001021
FBXO42	2.31139	1.707	3.12977	6.04e-08
FBXO45	1.52566	1.24029	1.87669	6.39e-05
FBXO5	2.03159	1.67045	2.4708	1.27e-12
FBXO7	1.85926	1.46273	2.36329	4.03e-07
FBXO8	1.53117	1.2303	1.90562	0.000135234
FBXO9	1.53762	1.18416	1.99659	0.00124522
FBXW11	1.49723	1.16736	1.92032	0.00147978
FBXW2	1.66599	1.32267	2.09842	1.46e-05
FBXW4	1.40222	1.07319	1.83213	0.0132236
FBXW5	1.61421	1.28606	2.02608	3.63e-05
FBXW8	1.31612	1.10435	1.5685	0.00214861
G2E3	2.01702	1.57063	2.59028	3.85e-08
GAN	3.99882	2.6312	6.07729	8.58e-11
GMCL1	1.72984	1.41205	2.11914	1.21e-07
GTF2H2	1.45887	1.04863	2.02961	0.0249729
GZF1	1.56371	1.25847	1.94299	5.47e-05
HACE1	1.89154	1.43522	2.49294	6.04e-06
HECTD1	1.51686	1.19139	1.93124	0.000721934
HECTD3	1.52948	1.18927	1.967	0.000931706
HECW1	1.5111	1.03282	2.21085	0.0334785
HECW2	4.05325	2.5332	6.4854	5.35e-09
HERC2	1.26762	1.02366	1.56973	0.0296765
HERC4	1.91325	1.43843	2.5448	8.27e-06
HIC1	1.46674	1.00874	2.13268	0.0449077
HIC2	1.59285	1.21187	2.09359	0.00084445
HLTF	1.46072	1.21703	1.75321	4.72e-05
HUWE1	1.65754	1.3154	2.08868	1.84e-05
IBTK	1.66712	1.35901	2.04508	9.47e-07
IPP	1.82507	1.38999	2.39633	1.49e-05
ITCH	1.5882	1.25622	2.00792	0.000110378
IVNS1ABP	1.71145	1.42391	2.05704	1.03e-08
JOSD1	1.75315	1.45794	2.10814	2.41e-09
JOSD2	1.35507	1.08982	1.68487	0.0062589
KBTBD2	1.71608	1.38629	2.12431	7.06e-07
KBTBD3	1.61104	1.20427	2.15522	0.00131902
KBTBD4	1.79337	1.36117	2.3628	3.3e-05
KBTBD6	1.49621	1.16929	1.91454	0.0013585
KBTBD7	1.60762	1.23239	2.09711	0.000463972
KBTBD8	1.34842	1.15167	1.57879	0.000203348
KCNA5	0.872359	0.777421	0.978891	0.0201847
KCNA6	258.683	24.7127	2707.78	3.54e-06
KCNB2	1.54504	1.05162	2.26999	0.0266666
KCNC4	2.58636	1.72754	3.87213	3.93e-06
KCND1	1.82417	1.41735	2.34776	3.03e-06
KCNG1	11.1616	1.92869	64.5937	0.00707595
KCTD10	2.11007	1.62985	2.73177	1.45e-08
KCTD12	1.25332	1.11532	1.4084	0.000148452
KCTD13	1.74311	1.34482	2.25937	2.69e-05
KCTD17	1.73432	1.44104	2.0873	5.69e-09
KCTD2	1.64302	1.29437	2.08558	4.5e-05
KCTD20	1.79035	1.45731	2.19952	2.92e-08
KCTD21	1.30778	1.01804	1.67997	0.0357375
KCTD3	1.7632	1.4888	2.08817	4.99e-11
KCTD5	1.74815	1.39151	2.19618	1.6e-06
KCTD6	1.55245	1.21641	1.98132	0.000409278
KCTD7	1.30362	1.01948	1.66696	0.034538
KCTD7.1	1.30362	1.01948	1.66696	0.034538
KCTD9	1.92906	1.55806	2.38839	1.65e-09
KDM2A	1.45959	1.17023	1.8205	0.000795316
KDM2B	1.92012	1.48336	2.48548	7.25e-07
KEAP1	1.78478	1.45498	2.18934	2.74e-08
KLHL10	3.80078	1.00006	14.4451	0.0499894
KLHL11	2.16447	1.71208	2.73639	1.08e-10
KLHL12	1.77717	1.45655	2.16837	1.47e-08
KLHL15	1.757	1.44125	2.14192	2.46e-08
KLHL17	1.61148	1.24404	2.08744	0.000301778
KLHL18	1.73175	1.37044	2.1883	4.23e-06
KLHL20	1.66989	1.32179	2.10966	1.72e-05
KLHL21	1.32057	1.0924	1.59639	0.00406381
KLHL22	1.55732	1.19337	2.03228	0.0011079
KLHL23	2.57078	1.95676	3.37748	1.2e-11
KLHL25	2.8168	1.87831	4.2242	5.47e-07
KLHL26	1.48671	1.15376	1.91575	0.00217236
KLHL28	1.55208	1.24009	1.94255	0.000123332
KLHL29	1.71325	1.33896	2.19217	1.86e-05
KLHL3	1.25779	1.01472	1.55908	0.0363186
KLHL31	1.76083	1.05704	2.93321	0.0297781
KLHL32	1.97382	1.51209	2.57655	5.7e-07
KLHL4	1.26453	1.078	1.48332	0.0039461
KLHL7	1.78938	1.36412	2.3472	2.64e-05
KLHL8	1.54887	1.23175	1.94763	0.00018164
KLHL9	1.33172	1.07518	1.64947	0.00869192
KRT8	1.35484	1.17708	1.55943	2.32e-05
LNX1	1.95619	1.38035	2.77224	0.00016196
LNX2	1.74783	1.33951	2.28061	3.9e-05
LONRF3	1.48144	1.10933	1.97836	0.00774456
LRRC29	1.80165	1.24213	2.61321	0.00191749
LRSAM1	1.4426	1.11664	1.86372	0.00504382
LZTR1	1.65627	1.26426	2.16983	0.000250644
MDM2	1.52152	1.2902	1.79432	6.1e-07
MDM4	1.51344	1.26439	1.81155	6.27e-06
MEX3A	2.47075	1.84278	3.31273	1.49e-09
MEX3B	1.2904	1.03525	1.60845	0.0233207
MEX3C	1.40882	1.17737	1.68577	0.000181768
MEX3D	1.6411	1.31454	2.04879	1.21e-05
MGRN1	1.96186	1.49578	2.57319	1.12e-06
MIB1	1.50228	1.2456	1.81185	2.07e-05
MIB2	1.57573	1.22784	2.0222	0.000353477
MID1	1.92151	1.43066	2.58075	1.43e-05
MKRN1	1.40979	1.10246	1.80279	0.00619227
MKRN2	2.05887	1.55955	2.71808	3.47e-07
MKRN3	1.53958	1.27323	1.86166	8.49e-06
MNAT1	1.92152	1.52607	2.41945	2.77e-08
MOCS3	2.0653	1.62276	2.62852	3.75e-09
MPND	1.6153	1.25413	2.08048	0.000204263
MSL2	1.5322	1.23619	1.89908	9.79e-05
MUL1	1.68164	1.32525	2.13388	1.89e-05
MYLIP	1.25804	1.10748	1.42908	0.000416297
MYNN	1.92144	1.48914	2.47924	5.11e-07
MYSM1	1.54747	1.22135	1.96067	0.000299298
NACC1	2.06235	1.67544	2.53861	8.59e-12
NAE1	2.03947	1.59279	2.61142	1.6e-08
NEDD4	1.3828	1.10714	1.7271	0.00427446
NEURL2	1.96526	1.1381	3.39359	0.015347
NFX1	1.27779	1.02533	1.59241	0.0290606
NFXL1	1.81267	1.4329	2.29309	7.1e-07
NOSIP	1.79366	1.41376	2.27564	1.5e-06
NSMCE1	1.42306	1.18259	1.71243	0.000187157
OTUB1	1.91185	1.50484	2.42894	1.12e-07
OTUB2	2.04717	1.44742	2.89544	5.11e-05
OTUD3	2.0762	1.60843	2.68001	2.04e-08
OTUD4	1.58934	1.27923	1.97464	2.87e-05
OTUD5	1.83941	1.45699	2.32221	2.98e-07
OTUD6B	1.89525	1.54081	2.33122	1.43e-09
OTUD7B	1.95297	1.56573	2.43599	2.92e-09
OTUD7B.1	1.95297	1.56573	2.43599	2.92e-09
PAN2	1.29776	1.07616	1.56499	0.0063675
PATZ1	1.75795	1.44203	2.14308	2.38e-08
PCGF1	1.67302	1.32576	2.11124	1.45e-05
PCGF2	1.539	1.24486	1.90264	6.78e-05
PCGF3	1.30419	1.04225	1.63197	0.0202489
PCGF6	1.95207	1.57199	2.42406	1.41e-09
PDZRN3	1.68271	1.01113	2.80035	0.0452264
PEX10	1.79914	1.35357	2.39138	5.23e-05
PEX2	1.94702	1.54025	2.46122	2.51e-08
PHF7	1.909	1.45882	2.49811	2.45e-06
PHRF1	1.51261	1.22247	1.8716	0.000139697
PJA1	1.60828	1.27647	2.02636	5.57e-05
PJA2	1.41645	1.11288	1.80283	0.004669
PPIL2	1.48607	1.17679	1.87665	0.000876993
PRPF19	1.87559	1.52405	2.30823	2.87e-09
PRPF8	1.6748	1.32421	2.11822	1.68e-05
PSMA1	1.82165	1.47114	2.25568	3.79e-08
PSMA2	1.97972	1.35511	2.89224	0.000413784
PSMA3	2.06791	1.6568	2.58105	1.32e-10
PSMA4	1.77657	1.44884	2.17843	3.32e-08
PSMA5	2.14322	1.71045	2.68548	3.49e-11
PSMA6	2.79283	2.04662	3.81112	9.46e-11
PSMA7	2.17153	1.73363	2.72005	1.5e-11
PSMA8	1.19633	1.05233	1.36003	0.006154
PSMB1	1.85709	1.46982	2.3464	2.13e-07
PSMB10	1.53931	1.22891	1.92811	0.000174135
PSMB2	2.60487	2.06547	3.28513	6.1e-16
PSMB3	2.46609	1.96875	3.08907	4.01e-15
PSMB4	2.23654	1.80386	2.773	2.17e-13
PSMB5	1.56846	1.25363	1.96235	8.24e-05
PSMB6	2.0115	1.59378	2.53869	3.99e-09
PSMB7	1.84916	1.46553	2.33321	2.2e-07
PSMB8	1.69424	1.37262	2.09121	9.16e-07
PSMB9	1.52243	1.24538	1.86111	4.11e-05
PSMC1	2.1717	1.69447	2.78334	9.04e-10
PSMC2	2.11742	1.69793	2.64056	2.75e-11
PSMC3	1.90316	1.51622	2.38884	2.87e-08
PSMC3IP	2.12426	1.76032	2.56345	3.91e-15
PSMC4	2.07045	1.632	2.6267	2.04e-09
PSMC5	2.17917	1.73631	2.73499	1.82e-11
PSMC6	1.97023	1.5662	2.47848	6.97e-09
PSMD1	2.29938	1.81047	2.92033	8.69e-12
PSMD10	1.90327	1.55399	2.33106	4.93e-10
PSMD11	2.3616	1.86812	2.98544	6.71e-13
PSMD12	2.11159	1.69294	2.63376	3.37e-11
PSMD13	2.09412	1.66461	2.63446	2.77e-10
PSMD14	2.24096	1.81929	2.76036	3.28e-14
PSMD14.1	2.24096	1.81929	2.76036	3.28e-14
PSMD2	2.25082	1.77029	2.86178	3.56e-11
PSMD3	2.34555	1.84943	2.97477	2.05e-12
PSMD4	2.04769	1.70172	2.46398	3.19e-14
PSMD5	1.7128	1.37283	2.13696	1.87e-06
PSMD6	2.08419	1.62808	2.66808	5.62e-09
PSMD7	1.99006	1.5788	2.50845	5.67e-09
PSMD7.1	1.99006	1.5788	2.50845	5.67e-09
PSMD8	2.08703	1.60745	2.70968	3.33e-08
PSMD9	3.23621	1.83435	5.70941	5.02e-05
PSME1	1.73079	1.36999	2.18661	4.24e-06
PSME2	1.70361	1.39182	2.08523	2.39e-07
PSME3	2.07908	1.67662	2.57815	2.6e-11
PSME4	1.64306	1.31765	2.04882	1.04e-05
PSMF1	2.20614	1.69916	2.86438	2.86e-09
PSMG1	1.86684	1.53626	2.26855	3.43e-10
PSMG2	1.85829	1.51209	2.28375	3.84e-09
PSMG3	1.9458	1.57143	2.40937	1.02e-09
PSMG4	1.85322	1.43893	2.38679	1.76e-06
RAB40A	3.04208	1.74672	5.29808	8.48e-05
RAB40C	1.69704	1.32176	2.17887	3.36e-05
RABGEF1	2.73445	1.70851	4.37645	2.76e-05
RAD18	2.50667	2.01468	3.1188	1.67e-16
RAG1	1.90804	1.33482	2.72743	0.000393778
RBBP6	2.00152	1.58267	2.53123	6.94e-09
RBCK1	1.36203	1.09686	1.69131	0.00516087
RBX1	2.1342	1.7096	2.66425	2.11e-11
RC3H1	1.58258	1.31011	1.91171	1.92e-06
RCHY1	1.8875	1.45726	2.44475	1.49e-06
RFFL	1.47203	1.1408	1.89943	0.00295085
RFPL4B	1.34323	1.1452	1.57551	0.000287811
RFWD3	2.06539	1.66567	2.56104	3.86e-11
RHOBTB2	1.22542	1.02313	1.46772	0.0272191
RHOBTB3	1.23263	1.02641	1.48027	0.025153
RING1	1.98353	1.57201	2.50277	7.79e-09
RLIM	1.67109	1.36535	2.0453	6.34e-07
RNF10	1.87405	1.48406	2.36653	1.32e-07
RNF103	1.68196	1.35657	2.0854	2.14e-06
RNF111	1.49574	1.16159	1.92601	0.00180171
RNF112	9.17327	3.66822	22.94	2.15e-06
RNF113A	1.76711	1.41997	2.19911	3.36e-07
RNF113B	1.61087	1.23376	2.10325	0.000458896
RNF114	1.74637	1.36946	2.22702	6.97e-06
RNF115	2.29009	1.80205	2.91029	1.23e-11
RNF121	1.61716	1.25943	2.07649	0.000164422
RNF122	1.55132	1.32665	1.81403	3.77e-08
RNF123	1.5759	1.22992	2.01921	0.000322822
RNF125	1.48894	1.26048	1.75882	2.82e-06
RNF126	1.71411	1.39414	2.1075	3.19e-07
RNF13	1.43384	1.12713	1.824	0.00334078
RNF135	1.26909	1.03585	1.55484	0.0214526
RNF138	1.7089	1.40016	2.08572	1.36e-07
RNF139	1.89756	1.54464	2.33112	1.05e-09
RNF144A	1.22746	1.05801	1.42404	0.0068512
RNF145	1.27972	1.06711	1.5347	0.00779966
RNF150	1.69833	1.01763	2.83436	0.0426783
RNF151	14.571	3.47723	61.0587	0.000247605
RNF157	1.54814	1.33845	1.79069	3.97e-09
RNF166	1.40352	1.10033	1.79026	0.00633539
RNF167	1.62483	1.28082	2.06124	6.36e-05
RNF168	1.24882	1.03282	1.50998	0.0218311
RNF169	1.72802	1.39045	2.14755	8.12e-07
RNF17	1.56459	1.12424	2.17742	0.0079445
RNF170	1.3785	1.09221	1.73984	0.0068797
RNF181	1.85861	1.46485	2.35821	3.35e-07
RNF183	1.83937	1.40635	2.40571	8.59e-06
RNF185	1.63939	1.30669	2.0568	1.94e-05
RNF187	1.55794	1.34724	1.8016	2.23e-09
RNF19A	1.40047	1.17759	1.66554	0.000139895
RNF19B	1.32001	1.10126	1.58221	0.00266962
RNF2	1.97592	1.58431	2.46434	1.51e-09
RNF20	1.57065	1.27345	1.93721	2.46e-05
RNF208	1.34231	1.08855	1.65523	0.00589488
RNF212	1.3815	1.0865	1.75659	0.00836651
RNF213	1.27099	1.06822	1.51226	0.00684886
RNF214	1.63177	1.28676	2.06927	5.34e-05
RNF215	1.5384	1.15349	2.05174	0.00336869
RNF216	1.45118	1.15397	1.82494	0.00144858
RNF220	2.19176	1.64612	2.91827	7.78e-08
RNF24	1.79846	1.46085	2.2141	3.15e-08
RNF25	1.95982	1.55352	2.47239	1.38e-08
RNF26	1.81832	1.46406	2.25831	6.38e-08
RNF31	3.02723	1.75702	5.21574	6.59e-05
RNF32	1.6857	1.18285	2.40231	0.00386429
RNF34	1.841	1.4635	2.31588	1.86e-07
RNF38	1.41647	1.12986	1.77578	0.00254089
RNF39	1.89338	1.42487	2.51594	1.08e-05
RNF4	1.9863	1.56266	2.5248	2.06e-08
RNF40	2.06274	1.63743	2.59853	7.96e-10
RNF41	1.6677	1.31868	2.1091	1.96e-05
RNF44	1.28031	1.05391	1.55535	0.0128191
RNF5	1.77961	1.40587	2.25269	1.65e-06
RNF6	1.55575	1.23836	1.95447	0.000146781
RNF7	1.56754	1.2258	2.00456	0.000340197
RNF8	2.11132	1.62005	2.75155	3.2e-08
RSPRY1	1.75202	1.33932	2.2919	4.28e-05
SAE1	2.03936	1.67498	2.48302	1.29e-12
SF3B3	2.05333	1.63163	2.58403	8.57e-10
SH3RF1	1.72399	1.46997	2.02191	2.13e-11
SHKBP1	1.77837	1.40179	2.25613	2.12e-06
SHPRH	1.47987	1.09471	2.00053	0.010825
SIAH1	2.08202	1.56423	2.7712	4.99e-07
SIAH2	1.73322	1.38815	2.16407	1.2e-06
SKP2	1.88826	1.49416	2.38632	1.03e-07
SMURF1	1.36662	1.12624	1.65832	0.0015543
SMURF2	1.49514	1.14754	1.94804	0.00288857
SOCS2	1.20154	1.03169	1.39934	0.018217
SOCS3	1.16264	1.09279	1.23696	1.87e-06
SOCS4	1.84638	1.4906	2.28709	1.97e-08
SOCS5	1.51596	1.19394	1.92483	0.000638075
SOCS6	1.43181	1.23335	1.66221	2.42e-06
SOCS7	1.41118	1.11413	1.78741	0.00428707
SPOP	1.66715	1.32951	2.09053	9.57e-06
SPOPL	1.76683	1.42834	2.18553	1.56e-07
SPSB1	1.29699	1.13828	1.47782	9.43e-05
SPSB2	1.30393	1.0263	1.65666	0.0298171
SPSB3	12.8115	3.67313	44.6849	6.3e-05
STAMBP	2.05203	1.58394	2.65845	5.28e-08
STAMBPL1	1.59979	1.26914	2.0166	6.96e-05
STUB1	1.67927	1.26368	2.23154	0.000352737
SYVN1	1.33944	1.05506	1.70047	0.0163871
TNFAIP1	1.48262	1.1888	1.84906	0.000474658
TOPORS	1.54396	1.24284	1.91804	8.71e-05
TRAF2	1.66867	1.37638	2.02304	1.88e-07
TRAF4	1.23954	1.08275	1.41903	0.00185697
TRAF5	1.42444	1.22041	1.66258	7.28e-06
TRAF6	1.38659	1.12425	1.71016	0.00225535
TRAF7	1.64571	1.31142	2.06521	1.71e-05
TRAIP	2.28775	1.91548	2.73238	6.68e-20
TRIM11	2.40082	1.90095	3.03213	1.94e-13
TRIM15	594.661	50.6182	6986.08	3.74e-07
TRIM17	1.79536	1.34036	2.40483	8.7e-05
TRIM21	1.43196	1.21071	1.69365	2.76e-05
TRIM23	1.51123	1.20527	1.89486	0.000346871
TRIM24	1.8034	1.444	2.25225	1.99e-07
TRIM25	1.50307	1.2598	1.79332	6.07e-06
TRIM26	2.01018	1.58612	2.54761	7.66e-09
TRIM27	1.57243	1.2692	1.94811	3.46e-05
TRIM28	1.8884	1.51367	2.3559	1.77e-08
TRIM31	1.51544	1.21528	1.88974	0.000223139
TRIM32	1.53435	1.23954	1.89926	8.4e-05
TRIM34	16.6273	1.48446	186.241	0.0225812
TRIM35	1.80422	1.44393	2.25439	2.08e-07
TRIM36	1.38672	1.10103	1.74653	0.00547455
TRIM37	1.92691	1.54143	2.40881	8.44e-09
TRIM38	1.34005	1.09062	1.64653	0.00534574
TRIM39	1.41733	1.07685	1.86545	0.012839
TRIM4	1.23834	1.00176	1.5308	0.048135
TRIM40	122.447	13.4404	1115.54	2e-05
TRIM41	1.67413	1.31645	2.12899	2.65e-05
TRIM45	1.44627	1.13264	1.84674	0.00309005
TRIM46	1.83436	1.57	2.14323	2.16e-14
TRIM47	1.46587	1.2908	1.66469	3.78e-09
TRIM54	1.36208	1.01246	1.83244	0.0411735
TRIM56	1.34611	1.11246	1.62883	0.00224574
TRIM58	1.44352	1.25127	1.6653	4.8e-07
TRIM59	1.99417	1.55041	2.56496	7.68e-08
TRIM61	1.49585	1.22384	1.82832	8.4e-05
TRIM62	1.56565	1.17527	2.08569	0.00218672
TRIM65	1.60694	1.29526	1.99362	1.62e-05
TRIM67	87.0842	14.1378	536.41	1.47e-06
TRIM68	1.50119	1.18604	1.90007	0.000727099
TRIM72	1.37079	1.07366	1.75016	0.0114029
TRIM74	5.17049	2.61637	10.218	2.27e-06
TRIM8	1.684	1.38438	2.04847	1.85e-07
TRIP12	1.6041	1.26015	2.04193	0.000124079
TTC3	1.35623	1.07139	1.71678	0.0112996
UBA1	2.08518	1.6411	2.64943	1.81e-09
UBA2	2.09556	1.67185	2.62666	1.37e-10
UBA3	1.90644	1.50839	2.40953	6.67e-08
UBA5	1.59572	1.23516	2.06153	0.000348701
UBA6	1.36532	1.07385	1.73589	0.0110366
UBE2A	1.90115	1.5519	2.32899	5.52e-10
UBE2B	1.35169	1.08285	1.68727	0.00773489
UBE2C	1.6697	1.49541	1.86432	7.97e-20
UBE2D1	1.92567	1.56759	2.36556	4.31e-10
UBE2D2	1.53922	1.21255	1.9539	0.000394915
UBE2D3	1.79682	1.41281	2.28519	1.78e-06
UBE2D4	1.48221	1.1456	1.91771	0.0027515
UBE2E1	1.48369	1.19216	1.84651	0.000408233
UBE2E2	1.34692	1.06304	1.7066	0.0136539
UBE2E3	1.43052	1.14434	1.78826	0.00166749
UBE2F	1.64101	1.19555	2.25244	0.0021745
UBE2G1	1.36841	1.1104	1.68637	0.00325777
UBE2G2	1.49848	1.22711	1.82986	7.26e-05
UBE2H	1.44548	1.18408	1.76458	0.000294413
UBE2I	2.0371	1.57342	2.63742	6.68e-08
UBE2J1	1.36366	1.10487	1.68306	0.00386729
UBE2J2	2.64753	2.02536	3.46082	1.05e-12
UBE2K	1.79491	1.4207	2.26768	9.41e-07
UBE2L3	2.194	1.72479	2.79086	1.55e-10
UBE2L6	1.31128	1.0976	1.56655	0.00282521
UBE2M	1.84612	1.41841	2.40282	5.13e-06
UBE2N	1.67583	1.36245	2.06131	1.02e-06
UBE2O	1.92764	1.52616	2.43474	3.63e-08
UBE2Q1	2.21063	1.755	2.78455	1.63e-11
UBE2Q2	1.29017	1.07314	1.55109	0.00670562
UBE2R2	1.77815	1.38172	2.28832	7.74e-06
UBE2S	2.04542	1.6875	2.47926	3.07e-13
UBE2T	1.79718	1.58676	2.03549	2.78e-20
UBE2V1	2.17961	1.56784	3.03011	3.56e-06
UBE2V2	2.16135	1.73739	2.68877	4.57e-12
UBE2W	1.85038	1.39294	2.45804	2.16e-05
UBE2Z	1.82589	1.47997	2.25267	1.93e-08
UBE3A	1.51244	1.19268	1.91794	0.000640249
UBE3B	1.70753	1.31219	2.22197	6.83e-05
UBE3C	1.68983	1.34535	2.1225	6.47e-06
UBE4A	1.50415	1.22094	1.85304	0.000125283
UBE4B	2.04225	1.56211	2.66996	1.77e-07
UBOX5	1.62865	1.17535	2.25679	0.00338129
UBOX5.1	1.62865	1.17535	2.25679	0.00338129
UBR1	1.64215	1.27075	2.12211	0.000149719
UBR2	1.2716	1.00694	1.60582	0.0435856
UBR3	1.45413	1.12032	1.88739	0.00489495
UBR4	1.63801	1.32039	2.03201	7.22e-06
UBR5	1.71391	1.40339	2.09313	1.27e-07
UCHL1	1.08056	1.02704	1.13688	0.00279758
UCHL3	1.47568	1.02647	2.12148	0.0356407
UCHL5	1.95745	1.59984	2.39499	6.79e-11
UHRF1	1.91099	1.66326	2.19561	6.11e-20
UHRF2	1.4397	1.15705	1.79141	0.00108275
UNK	1.50372	1.17259	1.92837	0.00130648
USP1	1.90532	1.57417	2.30613	3.64e-11
USP10	2.10274	1.63283	2.70788	8.44e-09
USP11	1.4404	1.16377	1.78278	0.000797021
USP12	1.19343	1.0149	1.40335	0.0324438
USP13	1.74138	1.45846	2.07919	8.69e-10
USP14	1.86553	1.52327	2.28469	1.64e-09
USP15	1.59723	1.23387	2.06759	0.000376922
USP16	1.67095	1.32288	2.11061	1.65e-05
USP17L6P	41467098536	1.65563	1.04e+21	0.0453671
USP19	1.70342	1.34305	2.1605	1.12e-05
USP2	1.22532	1.08959	1.37796	0.000693076
USP21	1.81257	1.46896	2.23654	2.93e-08
USP22	1.58095	1.28982	1.93781	1.03e-05
USP24	1.49686	1.1912	1.88095	0.000537487
USP25	1.45521	1.17851	1.79686	0.0004894
USP26	203.003	1.47256	27985.5	0.0345206
USP27X	1.77513	1.27687	2.46783	0.000640296
USP28	1.39229	1.13779	1.70371	0.00131204
USP30	1.40108	1.07463	1.8267	0.0127096
USP31	2.44145	1.87002	3.18748	5.34e-11
USP32	2.05958	1.64536	2.57808	2.85e-10
USP33	1.48062	1.15619	1.89608	0.00187061
USP34	1.5553	1.23854	1.95307	0.000144013
USP36	1.77887	1.41806	2.23147	6.36e-07
USP37	2.70914	2.09354	3.50577	3.52e-14
USP38	1.93864	1.57194	2.39088	6.1e-10
USP39	2.03648	1.61761	2.56381	1.42e-09
USP4	1.61673	1.26406	2.0678	0.000130078
USP42	1.45491	1.15738	1.82891	0.00131758
USP43	4.16944	1.87015	9.29564	0.000482461
USP45	1.47563	1.14967	1.894	0.00224932
USP46	1.40701	1.06959	1.85088	0.0146516
USP47	1.64204	1.27999	2.10649	9.53e-05
USP48	1.65592	1.30833	2.09585	2.72e-05
USP49	1.24138	1.10562	1.3938	0.000252925
USP5	1.70529	1.38639	2.09754	4.35e-07
USP50	1.39641	1.05121	1.85496	0.0211829
USP51	1.77935	1.34518	2.35367	5.4e-05
USP53	1.36045	1.13818	1.62613	0.000719413
USP7	1.82073	1.43444	2.31104	8.42e-07
USP8	1.53451	1.13972	2.06605	0.00477598
USP9X	1.65128	1.30745	2.08553	2.55e-05
VCPIP1	2.10417	1.70563	2.59583	3.82e-12
VHL	1.59917	1.28685	1.98729	2.29e-05
VPS11	1.81849	1.42588	2.3192	1.44e-06
VPS18	1.51228	1.18565	1.92891	0.000863538
VPS41	1.67904	1.37887	2.04456	2.51e-07
WDSUB1	1.40512	1.13104	1.74561	0.00212459
WSB1	1.351	1.11473	1.63736	0.00216001
WSB2	1.4873	1.2225	1.80945	7.24e-05
WWP1	2.00522	1.57881	2.5468	1.17e-08
WWP2	1.86495	1.42022	2.44895	7.33e-06
XIAP	1.41982	1.1595	1.73858	0.000693731
YOD1	1.47274	1.27563	1.70032	1.29e-07
ZBTB1	1.49188	1.20494	1.84716	0.000242009
ZBTB11	1.53078	1.20246	1.94874	0.000546499
ZBTB12	1.69209	1.38599	2.0658	2.39e-07
ZBTB16	1.38385	1.1643	1.6448	0.000227984
ZBTB17	1.91046	1.49545	2.44065	2.21e-07
ZBTB2	1.42398	1.12794	1.79773	0.00295517
ZBTB24	1.90887	1.48306	2.45694	5.16e-07
ZBTB25	1.69227	1.31925	2.17077	3.46e-05
ZBTB26	1.29874	1.07174	1.57382	0.00765733
ZBTB3	1.81615	1.38836	2.37576	1.34e-05
ZBTB32	1.34722	1.19858	1.51429	5.83e-07
ZBTB33	1.67274	1.37024	2.04203	4.31e-07
ZBTB37	1.72729	1.41099	2.1145	1.18e-07
ZBTB38	1.25194	1.06289	1.47461	0.00714175
ZBTB39	1.87335	1.46277	2.39917	6.59e-07
ZBTB41	1.63169	1.32446	2.0102	4.22e-06
ZBTB43	1.32354	1.14753	1.52656	0.000118131
ZBTB44	1.42983	1.16995	1.74744	0.000476528
ZBTB45	1.71259	1.35441	2.16549	6.99e-06
ZBTB48	1.77305	1.44203	2.18006	5.58e-08
ZBTB49	1.58531	1.22338	2.0543	0.000492596
ZBTB5	1.45274	1.19197	1.77056	0.000215919
ZBTB6	1.49406	1.23724	1.8042	3.02e-05
ZBTB7B	1.67292	1.39338	2.00855	3.47e-08
ZBTB7C	1.91395	1.37946	2.65551	0.000102181
ZBTB8A	1.9192	1.40302	2.62528	4.53e-05
ZBTB9	1.45751	1.19124	1.78331	0.000252169
ZFAND3	1.81169	1.42229	2.3077	1.49e-06
ZFAND5	1.51399	1.25926	1.82025	1.02e-05
ZFAND6	1.33172	1.09622	1.6178	0.00391077
ZFPL1	1.56527	1.1733	2.0882	0.00231371
ZNF131	1.85399	1.45856	2.35663	4.56e-07
ZNF598	1.7636	1.4469	2.14963	1.93e-08
ZNRF1	1.73084	1.33814	2.23879	2.93e-05
ZNRF2	1.57669	1.25113	1.98696	0.000114045
ZNRF3	1.93675	1.49916	2.50207	4.22e-07
ZRANB1	1.67456	1.26557	2.21573	0.000308033
