# Supplementary material for: A nomogram for predicting prognosis of multiple myeloma patients based on a ubiquitin-proteasome gene signature
Source: Aging (Albany NY). 2022 Dec 18;14(24):9951–68. doi: 10.18632/aging.204432 (PMC9831738; doi:10.18632/aging.204432)
Supplement: Supplementary Table 3 [file aging-14-204432-s004.xlsx]

## Sheet: Sheet1
Supplementary Table 3. Survival related ubiquitin-proteasome genes in GSE2658.
Symbol	Hazard Ratio	HR.95L	HR.95H	p-value
ABTB2	1.26457	1.02448	1.56093	0.0288845
ANKFY1	0.489762	0.269879	0.888791	0.01889
ANKIB1	1.73383	1.12207	2.67914	0.0131864
ASB13	1.31951	1.1053	1.57523	0.00215715
ASB15	0.841705	0.725793	0.976129	0.0226335
ASB4	0.684295	0.48988	0.955865	0.026104
ASB5	0.899643	0.81291	0.99563	0.040891
ATG10	0.552763	0.317564	0.962157	0.0360481
BARD1	1.65348	1.1683	2.34016	0.00454402
CCIN	0.636972	0.458322	0.88526	0.00723845
CISH	0.662485	0.52277	0.83954	0.000656188
CUL9	0.58532	0.367916	0.93119	0.0237648
FANCL	1.68463	1.21409	2.33752	0.00180366
FBXL5	0.668102	0.449504	0.993008	0.0460796
FBXL6	1.39622	1.0535	1.85044	0.0202002
FBXL7	1.32057	1.00391	1.73711	0.0468287
FBXO10	0.666746	0.477151	0.931677	0.0175711
FBXO16	0.619208	0.459549	0.834337	0.00163046
FBXO2	0.546567	0.379257	0.787686	0.00119557
FBXO30	0.620972	0.419225	0.919807	0.0174552
FBXO36	0.672119	0.510406	0.885067	0.00466348
FBXO44	0.647306	0.428376	0.978124	0.0389251
FBXO45	2.05012	1.24271	3.38212	0.00494326
FBXO5	1.44138	1.12421	1.84802	0.00393449
FBXO8	0.526991	0.337148	0.823732	0.00494117
FBXW7	0.6883	0.487271	0.972264	0.0340418
G2E3	2.70299	1.61446	4.52545	0.000155792
GAN	1.62743	1.11643	2.37233	0.0113181
GMCL1	2.01522	1.2618	3.2185	0.00335222
HERC6	0.786812	0.641295	0.965349	0.0215641
IVNS1ABP	1.74475	1.1062	2.75192	0.0166625
KBTBD7	0.684494	0.481277	0.973518	0.0349184
KCNA2	0.691549	0.545202	0.877179	0.00236464
KCNG1	0.788283	0.624696	0.994708	0.0449978
KCTD12	1.16018	1.03077	1.30584	0.0138085
KCTD21	0.773265	0.651376	0.917963	0.00330325
KCTD3	1.60585	1.22722	2.10129	0.000555672
KLHL20	1.78802	1.05706	3.02444	0.0302443
KLHL22	0.574911	0.390605	0.846182	0.00500221
MAP3K1	0.592056	0.394007	0.889654	0.0116457
44630	0.730593	0.572577	0.932217	0.0115882
44631	1.19136	1.01348	1.40046	0.0338117
44628	0.508755	0.331302	0.781256	0.00201564
MIB2	0.499015	0.316629	0.78646	0.00274509
NEURL3	0.818542	0.677396	0.989099	0.0381286
OTUD1	0.781794	0.61123	0.999955	0.0499578
OTUD6B	1.93184	1.29589	2.87987	0.00122787
OTUD7A	0.720129	0.574255	0.903058	0.00447068
OTUD7A.1	0.720129	0.574255	0.903058	0.00447068
PCGF3	0.456561	0.285629	0.729787	0.00105183
PCGF5	0.520053	0.351391	0.769671	0.00108007
PJA1	1.7151	1.10563	2.66052	0.0160296
PSMA4	1.53741	1.06181	2.22605	0.0227539
PSMB4	1.90507	1.20204	3.01929	0.00608486
PSMC1	1.92855	1.26252	2.94592	0.0023783
PSMC2	1.6632	1.03574	2.67079	0.0352679
PSMC3IP	1.58754	1.12903	2.23226	0.00786419
PSMC4	2.13244	1.27701	3.5609	0.0037961
PSMD10	1.58001	1.03663	2.40821	0.0333963
PSMD11	1.45467	1.04732	2.02045	0.0253664
PSMD14	1.44181	1.01249	2.05315	0.0424779
PSMD14.1	1.44181	1.01249	2.05315	0.0424779
PSMD2	1.77206	1.10257	2.84806	0.0181135
PSMD4	1.84914	1.30222	2.62574	0.000590303
PSME3	1.68881	1.06038	2.68966	0.0273222
PSME4	1.79941	1.0772	3.00583	0.0248312
PSMG1	1.40047	1.00897	1.94388	0.044081
RAB40B	0.595956	0.404438	0.878165	0.00887541
RBX1	1.80481	1.21124	2.68927	0.00371051
RCBTB2	0.760263	0.63545	0.909592	0.00273893
RFPL1	0.836885	0.733975	0.954225	0.00781742
RFWD2	1.97176	1.31667	2.95279	0.000983582
RNF115	2.15143	1.30389	3.54985	0.00271286
RNF125	1.36815	1.09873	1.70364	0.00508725
RNF126	1.86252	1.11488	3.11154	0.0175359
RNF138	1.7389	1.07439	2.81443	0.0243205
RNF141	0.685691	0.49174	0.956141	0.0261244
RNF152	0.681807	0.551645	0.842681	0.000394696
RNF17	0.697069	0.489881	0.991884	0.0449367
RNF170	0.459577	0.250312	0.843789	0.0121462
RNF212	0.775914	0.613198	0.981806	0.0346118
RNF214	0.656071	0.439827	0.978631	0.0388442
RNF215	0.81218	0.670796	0.983365	0.033018
RNF217	0.681321	0.477022	0.973116	0.0348752
RNF40	1.79196	1.07314	2.99229	0.0257619
RNF6	0.683615	0.47585	0.982094	0.0396181
SAE1	1.73954	1.11392	2.71654	0.0149187
SF3B3	1.78646	1.06146	3.00666	0.0289235
SIAH1	1.68507	1.12036	2.53442	0.0122212
SKP2	1.80006	1.17536	2.7568	0.00687393
SOCS1	0.625805	0.454421	0.861826	0.00409559
STUB1	0.650447	0.434081	0.97466	0.0371285
TCEB3	0.535413	0.300146	0.955092	0.034382
TRAF3	0.749703	0.567112	0.991083	0.0430876
TRAIP	1.33088	1.08415	1.63377	0.00629063
TRIM13	0.493633	0.315458	0.772444	0.00200064
TRIM2	0.637768	0.522403	0.77861	9.96e-06
TRIM21	1.66819	1.17563	2.36712	0.00415389
TRIM22	0.844857	0.733637	0.972938	0.0192371
TRIM28	1.46429	1.01117	2.12046	0.0435099
TRIM33	0.527874	0.346792	0.803509	0.00287741
TRIM47	1.1517	1.00198	1.3238	0.0468407
TRIM5	0.713723	0.516165	0.986894	0.0413747
TRIM55	0.811265	0.672724	0.978337	0.0285831
TRIM58	1.24156	1.06965	1.44109	0.00443479
TRIM59	1.5721	1.13073	2.18576	0.00713013
UBA1	1.95037	1.23097	3.09019	0.00444183
UBA2	2.14291	1.29268	3.55234	0.00312218
UBE2A	2.08707	1.45208	2.99975	7.03e-05
UBE2C	1.70237	1.36169	2.1283	3.02e-06
UBE2G2	1.83878	1.23578	2.736	0.00266367
UBE2Q1	1.70542	1.05985	2.74421	0.0278435
UBE2S	1.36388	1.10635	1.68136	0.00365514
UBE2T	1.61676	1.31569	1.98671	4.89e-06
UBR2	0.359282	0.200737	0.643046	0.000567639
UCHL1	1.15228	1.02639	1.29362	0.0163427
UCHL5	1.95187	1.27383	2.99081	0.0021296
UHRF1	1.26097	1.06383	1.49463	0.00750886
UNK	0.578471	0.359648	0.930435	0.0239884
USP10	1.61647	1.02827	2.54113	0.0374551
USP14	2.74115	1.60121	4.69264	0.000236741
USP21	2.05761	1.29926	3.2586	0.00209792
USP24	0.581869	0.374506	0.904049	0.0160119
USP30	0.458561	0.287736	0.730803	0.00104231
USP33	0.582958	0.382594	0.888253	0.0120237
USP35	0.572661	0.389363	0.84225	0.00462333
USP46	0.541113	0.361463	0.810051	0.00285162
USP9Y	0.893356	0.802427	0.994588	0.0394896
USPL1	0.608851	0.39291	0.943472	0.026395
WHSC1	1.19642	1.06152	1.34847	0.00330256
WWP1	2.07851	1.36945	3.1547	0.000588499
YOD1	1.77634	1.27703	2.47088	0.000644279
ZBTB17	0.708832	0.516209	0.973332	0.0334176
ZBTB20	0.681979	0.518922	0.896274	0.00604256
ZBTB22	0.589538	0.38882	0.893873	0.0128369
ZBTB24	0.571631	0.341718	0.956234	0.033135
ZBTB33	1.48167	1.01385	2.16537	0.0422548
ZBTB4	0.382301	0.257486	0.567619	1.86e-06
ZBTB5	0.600578	0.367817	0.980635	0.0415367
ZBTB7A	0.458992	0.254907	0.826472	0.0094562
ZNRF3	1.58065	1.11114	2.24856	0.010897
